# Supplementary material for: Telomeric double-strand DNA-binding proteins DTN-1 and DTN-2 ensure germline immortality in Caenorhabditis elegans
Source: eLife. 2021 Jan 21;10:e64104. doi: 10.7554/eLife.64104 (PMC7819708; doi:10.7554/eLife.64104)
Supplement: Figure 2—source data 1. [file elife-64104-fig2-data1.xlsx]

## Sheet: Figure 2D
	1st experiment			2nd experiment			3rd experiment
	DTN-1 concentraiton (μM)	%DNA bound		DTN-1 concentraiton (μM)	%DNA bound		DTN-1 concentraiton (μM)	%DNA bound
	0	2.65468		0	2.91467		0	2.3439
	0.54375	21.4892		0.54375	21.8023		0.54375	18.3821
	1.0875	63.7505		1.0875	60.4918		1.0875	60.4407
	2.175	88.2747		2.175	81.0839		2.175	88.2244
	4.35	97.0414		4.35	95.1314		4.35	95.7933
	8.7	98.8106		8.7	98.5528		8.7	98.8656
	1st experiment			2nd experiment			3rd experiment
	DTN-2 concentraiton (μM)	%DNA bound Binding		DTN-2 concentraiton (μM)	%DNA bound Binding		DTN-2 concentraiton (μM)	%DNA bound Binding
	0	2.31328		0	2.98958		0	2.45594
	0.20625	5.42325		0.20625	13.1461		0.20625	5.85584
	0.4125	34.6719		0.4125	40.8422		0.4125	32.3167
	0.825	70.584		0.825	75.8991		0.825	65.4451
	1.65	91.4032		1.65	85.9789		1.65	85.9451
	3.3	95.9808		3.3	97.2794		3.3	96.7562
