# Supplementary material for: Telomeric double-strand DNA-binding proteins DTN-1 and DTN-2 ensure germline immortality in Caenorhabditis elegans
Source: eLife. 2021 Jan 21;10:e64104. doi: 10.7554/eLife.64104 (PMC7819708; doi:10.7554/eLife.64104)
Supplement: Figure 3—source data 1. [file elife-64104-fig3-data1.xlsx]

## Sheet: Figure 3A
	DTN-1 embryo	DTN-2 embryo	DTN-1 germline	DTN-2 germline
	23	19	11	15
	26	22	13	12
	21	20	12	12
	23	25	12	16
	22	25	14	13
	24	22	11	13
	24	28	12	14
	22	29	11	13
	25	18	13	12
	20	21	12	13
	21	20	12	14
	26	24	10	12
	23	24	14	13
	23	24	14	12
	22	18	12	13
	24	21	12	13
	24	23	14	11
	20	24	13	13
	22	18	13	12
	22	22	12	13
	18	26	12	14
	21	25	10	12
	26	24	14	13
	26	24	11	13
	27	21	11	12
	18	21	13	10
	21	23	12	16
		22	13	12
		24	13	11
		21	10	14
		20	11	10
		19	13	13
		22	12	10
			12	13
			12	14
			13	11
			11	12
			14	11
			14	12
			12	12
			12	13
			11	11
			14	12
			15	13
			11	11
			10	12
			13	13
			12	14
			9	12
			12	12
			13	13
			12	14
			11	12
			10	13
			12	10
			12	12
			12	12
			12	13
			13	13
			13	12
			12	13
			12	12
			13	13
			10	12
			12	12
			12	13
			12	13
			12	12
			13	14
				11
				11
				12
				11
				12
				14
				12
				11
				14
				12
