# Supplementary material for: Telomeric double-strand DNA-binding proteins DTN-1 and DTN-2 ensure germline immortality in Caenorhabditis elegans
Source: eLife. 2021 Jan 21;10:e64104. doi: 10.7554/eLife.64104 (PMC7819708; doi:10.7554/eLife.64104)
Supplement: Figure 4—source data 1. [file elife-64104-fig4-data1.xlsx]

## Sheet: Figure 4D
dtn-1	+/+	+/+	+/+	+/-	+/-	+/-	-/-	-/-	-/-
dtn-2	+/+	+/-	-/-	+/+	+/-	-/-	+/+	+/-	-/-
	299	328	322	335	321	291	288	287	28
	269	341	329	367	392	293	409	363	14
	256	314	323	358	322	322	302	320	14
	358	293	403	361	289	286	265	375	18
	362	370	353	347	334	298	268	387	0
	321	377	444	335	367	316	386	334	22
	308	379	270	414	356	320	300	387	59
	351	348	326	363	381	387	302	311	20
	305	358	312	364	357	424	391	333	0
	307	381	382	353	358	408	353	353	70
	337	333		329	320	352	343	381	32
	338	327		316	380	361	329	325	0
	380	316		305	297	366	372	324	0
	405	383		258	313	354	353	361	19
	392	373		308	349	347	444	346	28
	378	323		331	342	366	346	460	0
	424	388		385	310	400	385	399	62
	365	339		333	326	383	315	392	40
	346	393		372	231	377	338	401	0
	371	367		321	320	350	400	315	0
	425	409		368	294	344		348	19
	377	395		390	379	339		389	0
	275	392		409	352	325		311	0
	322	382		329	333	379		341	20
	315	398		380	398	437		339	0
	317	371		365	333	432		400	23
		376		333	450	429		414	13
		300		330	408	379			7
		311		324	363	366			0
		370		350	404	402			0
		378		406	388	419			0
		313		269	318	330
		340		344	281	349
		347		262	378	307
		376		278	355	366
				315	402	316
				319	346	386
				316	354	354
				224	351	342
					364	370
					404	392
					332	313
					344	334
					365
					370
					388
					340
					334
					347
					353
					370
					356
					310
					327
					292
					273
					346
					360
					337
					315
					356
					300
					343
					361
					335

## Sheet: Figure 4E
	G1	G2	G3	G4	G5
	0	0	0	0	2
	29	0	0	0	9
	0	0	0	0	1
	66	10	0	0	2
	0	0	0	0	79
	30	0	0	0	0
	0	0	0	0	0
	32	0	0	0	0
	48	0	0	0	0
	11	0	0	0	0
	0	13	0	0	0
	0	11	0	0	0
	44	0	0	0	0
	0	0	0	0	0
	0	16	0	0	0
	16	19	0	0	0
	13	16	0	0	0
	0	0	0	0	0
	40	0	0	0	0
	0	10	0	0	0
	0	22	0	0	0
	14	43	0	0	0
	0	0	0	0	0
	81	0	0	0	0
	0	0	0	0	0
	0	15	0	0	0
	5	2	0	0	0
	0	9	0	0	0
	39	0	1	0	0
	5	0	3	0	0
	14	0	0	0	0
	0	11	0	0	0
	0	0	28	0	0
	13	12	0	0	0
	8	0	4	0	0
	11	0	37	0	0
	1	30	4	0	0
	5	0	0	0	0
	0	0	0	0	0
	4	27	0	0	0
	0	0	2	0	0
	0	0	0	0	0
	0	0	0	0	0
	0	6	0	0	0
	29	0	0	0	19
	0	38	0	0	2
	0	0	27	0
	37	0	0	0
	29	15	0	0
	0	0	0	0
	0	0	7	10
	0	0	0	5
	0	0	0	1
	0	0	7	5
	0	0	0	3
	0	0	0	4
	0	0	0	0
	0	0	0	9
	0	0	0	4
	0	0	0	1
	12	1	8
	10	0	0
	0	0	6
	8	0	0
	3	0	0
