# Supplementary material for: Telomeric double-strand DNA-binding proteins DTN-1 and DTN-2 ensure germline immortality in Caenorhabditis elegans
Source: eLife. 2021 Jan 21;10:e64104. doi: 10.7554/eLife.64104 (PMC7819708; doi:10.7554/eLife.64104)
Supplement: Figure 5—source data 1. [file elife-64104-fig5-data1.xlsx]

## Sheet: Figure 5A
	N2					dtn-1					dtn-2					dKO
	male number	n	ratio			male number	n	ratio			male number	n	ratio			male number	n	ratio
replicate 1	0	1358	0		replicate 1	1	3103	0.0322269		replicate 1	2	2244	0.0891266		replicate 1	32	473	6.76533	(generation1)
replicate 2	0	1354	0		replicate 2	0	2866	0		replicate 2	0	2554	0		replicate 2	25	186	13.4409	(generation2)
replicate 3	0	1413	0		replicate 3	3	2872	0.104457		replicate 3	6	3004	0.199734		replicate 3	24	184	13.0435	(generation1)
replicate 4	1	1211	0.0825764		replicate 4	1	2374	0.042123		replicate 4	2	2084	0.0959693		replicate 4	8	140	5.71429	(generation2)
replicate 5	0	1215	0		replicate 5	1	2055	0.0486618		replicate 5	2	2431	0.0822707		replicate 5	16	130	12.3077	(generation3)
	sam	6551				sam	13270				sam	12317				sam	1113
	summary
		N2	dtn-1	dtn-2	dKO
		0	0.0322269	0.0891266	6.76533
		0	0	0	13.4409
		0	0.104457	0.199734	13.0435
		0.0825764	0.042123	0.0959693	5.71429
		0	0.0486618	0.0822707	12.3077
	mean	0.0165153	0.0454937	0.09342	10.2543
	SD	0.0330306	0.0338932	0.0635282	3.31466
	p (vs N2)		0.25555	0.0639625	0.000266023

## Sheet: Figure 5C
	N2	dKO
	0	3
	0	1
	0	0
	0	1
	0	3
	0	2
	0	1
	0	4
	0	3
	0	4
	0	0
	0	5
	0	4
	0	0
	0	1
	0	3
	2	0
		2

## Sheet: Figure 5E
	WT	dKO
	1.10402	5.41363
	0.547835	4.29249
	0.866014	8.71275
	0.897331	3.89122
	2.31285	7.05839
	1.34495	2.45816
	0.772481	2.31452
	0.802963	3.94759
	0.458061	1.9976
	0.778745	1.2034
	0.756614	10.9095
	1.3675	7.53566
	0.290202	4.4925
	0.629677	7.86595
	0.658906	11.0644
	0.586668	11.0891
	1.58588	7.34108
	0.622578	3.05986
	0.921549	0.706507
	0.357012	0.449292
	0.988776	6.76318
	0.190406	2.79137
	0.082259	2.51745
	0.556187	5.508
	0.45639	3.22605
	0.809644	3.63191
	0.686047	1.69278
	0.412129	21.8316
	0.783338	3.92838
	0.149903	3.30747
	0.43927	23.8095
	0.196252	8.73113
	2.73667	11.834
	0.32486	0.762042
	1.23096	4.38728
	2.29573	2.50868
	1.60509	3.75426
	1.15121	5.30674
	1.28399	6.36692
	0.476851	3.91585
	0.579987	8.0551
	0.941175	5.02447
	1.02135	7.0325
	1.1107	3.91377
	1.41677	4.16012
	0.732396	1.60467
	0.813819	2.41974
	0.732813	1.68192
	1.64685	9.3775
	1.0489	4.87039
	1.19213	2.06983
	0.83929	4.67915
	1.2723	3.98057
	1.39255	2.26567
	1.34328	1.62889
	1.14453	5.39192
	0.617985	13.485
	1.64518	2.09196
	0.689805	4.72216
	0.657235	1.80385
	0.924055	4.10543
	0.527375	5.0846
	0.933658	13.5556
	3.51959	4.04947
	1.74706	2.20888
	1.21551	0.276841
	0.488125	8.29102
	1.38462	2.14416
	0.897331	0.671432
	2.21932	1.59465
	0.220053	4.34302
	1.38253	5.09921
	1.10152	13.4082
	1.58672	4.68875
	0.806721	3.20434
	0.321102	3.94091
	0.624248	7.54735
	4.49793	2.25314
	1.55582	7.49808
	1.16833	0.725715
	0.446369	8.72946
	0.775404	7.5319
	0.240096	4.63447
	0.586668	4.17599
	0.436765	18.8352
	0.48896	4.62069
	0.993787	7.70602
	0.998797	4.24823
	1.41636	9.46018
	1.26896	10.1182
	0.970821	4.5472
	1.03513	7.59662
	0.94201	6.14394
	1.95041	11.0068
	1.11237	1.79508
	0.625919	20.6896
	0.758284	4.32506
	0.756197	2.49365
	1.08106	4.45617
	0.637193	7.70268

## Sheet: Figure 5F
	N2	dtn-1	dtn-2
	2.89146	5.58841	0.709057
	1.32359	2.17345	0.618242
	1.14763	4.12795	0.589207
	1.50478	3.54027	0.654917
	0.692466	1.09502	1.12384
	1.73881	1.18256	0.045626
	0.833492	4.07446	0.648368
	0.482238	1.8425	0.717353
	1.6851	2.96023	0.709931
	0.932166	1.78312	0.500794
	1.05114	6.9561	0.531793
	1.12908	4.97082	0.067456
	0.826724	5.7028	0.671945
	0.501885	3.96443	2.03898
	0.931511	2.55702	1.62813
	0.834801	5.35919	0.458661
	0.478745	3.18268	0.600996
	0.686572	2.80436	0.761451
	0.712987	5.53012	0.635052
	0.630249	6.78931	1.12166
	0.91623	1.20963	0.974517
	0.59794	3.4846	0.593355
	1.84949	1.41964	0.511272
	1.29739	2.01889	0.326804
	0.660375	2.82662	0.164384
	1.22077	1.42881	0.278995
	1.17427	1.05245	1.03106
	0.373521	3.05213	0.792232
	0.59401	3.01415	0.447527
	2.43979	0.546856	0.434429
	2.09857	2.54261	0.845935
	2.273	1.6159	0.414344
	0.724994	2.63364	1.17252
	1.13912	1.3201	0.966658
	0.357148	4.42419	0.176609
	2.20489	1.36638	0.436612
	1.34629	2.98817	1.00268
	1.29281	1.87459	0.551659
	0.864928	2.30225	0.078153
	2.02042	2.05884	0.414344
	1.23561	6.8703	0.986742
	1.8652	2.95804	0.974299
	1.38144	2.65896	0.808168
	0.726522	1.81958	1.28691
	1.07581	3.3809	1.0077
	1.45785	1.53731	1.30525
	2.53715	2.75589	0.296678
	0.402338	1.91629	0.688973
	1.40873	3.27306	0.480491
	1.60673	0.930419	0.158708
	1.24674	10.788	0.723902
	1.17012	1.31573	0.210229
	1.37642	1.56896	0.373085
	0.704036	4.2312	1.08913
	0.911863	0.442069	1.54146
	0.959017	3.77385	1.45632
	0.736346	2.25794	1.22928
	0.582877	0.525025	1.20396
	1.33756	0.87104	0.665396
	0.590299	2.30553	0.347543
	1.17449	4.33533	0.862526
	0.456477	2.93294	0.785246
	0.194729	3.77473	0.367409
	0.958581	4.88918	1.1937
	0.587461	3.57279	0.155434
	0.476562	10.1693	0.430717
	0.66365	7.99305	0.311086
	1.07428	11.6575	0.38531
	0.407577	3.44399	1.05158
	0.875625	5.54344	1.28822
	1.00181	5.86086	0.37243
	0.578947	2.87618	0.840477
	0.0923434	5.26423	0.595757
	1.07756	2.83972	0.599249
	0.226383	1.03128	1.00639
	0.494026	0.909899	0.477653
	0.424823	2.31164	1.11991
	0.535504	1.36419	0.342085
	0.848555	2.52361	0.436175
	0.881955	2.8347	0.481801
	0.994165	4.20108	0.629594
	0.968186	3.35536	0.816027
	0.847681	5.71437	0.473069
	0.489442	2.40704	0.624136
	0.580475	2.35377	1.18387
	1.66436	10.6254	1.56176
	0.430717	2.35814	0.893962
	0.549694	8.41394	0.560828
	0.678494	3.63632	0.481583
	0.705128	2.76179	0.844407
	1.04809	5.27383	1.66829
	1.49081	4.99287	1.47335
	0.781535	7.27897	2.09355
	1.13301	2.32539	1.15353
	1.28931	2.15119	1.08673
	1.01665	1.63838	0.947011
	1.65563	1.42816	1.1365
	0.0445344	1.03979	0.646622
	0.587461	3.75857	0.936095
	0.239263	5.41639	0.82083
	0.845819	6.31481	1.04459
	0.963739	5.19348	2.03478
	1.34633	2.20776	0.597623
	1.69576	0.874866	0.078469
	0.449355	4.87159	1.57003
	0.922771	0.899143	0.192921
	0.941413	3.10994	0.976529
	0.690832	3.79253	1.1003
	1.09532	2.32373	0.240393
	0.683678	3.01131	0.143065
	0.898493	5.72825	0.585267
	1.76577	4.98972	0.15282
	0.465829	2.05515	0.524356
	2.09157	3.20098	0.637507
	0.79011	1.54879	0.370235
	1.48441	3.765	0.590469
	2.6673	3.11492	0.747191
	4.10771	4.8278	0.678259
	1.15623	3.35987	0.81092
	1.60016	3.15329	0.441768
	0.659184	4.03856	0.119221
	0.0197257	4.7567	0.742855
	0.777104	3.3254	0.164959
	0.709257	2.92287	0.664386
	0.193572	2.13276	0.608678
	0.878767	3.31088	1.27978
	1.63354	9.42627	0.599573
	1.45515	4.13567	0.676742
	0.704271	1.93702	0.157372
	1.49395	2.76875	0.53281
	1.5631	6.61092	0.374571
	1.32986	1.96975	0.31366
	1.09488	3.6835	0.263587
	0.54885	6.22789	0.270523
	1.53405	0.424427	3.28638
	0.909765	3.21897	1.30363
	1.0938	2.66903	1.30038
	0.640325	3.14852	2.55328
	0.86186	5.89017	1.04416
	0.854273	2.76484	1.49633
	0.572044	4.28697	1.12046
	0.916701	3.48342	1.00319
	0.697985	4.79464	0.870747
	0.986717	3.32909	0.54083
	0.919953	4.00648	1.01685
	0.135262	9.51774	1.47075
	3.54715	3.91002	0.910415
	0.917568	2.31939	1.97387
	0.741121	2.54071	1.03917
	0.479919	3.37591	0.971543
	0.408386	9.64173	2.18001
	0.919519	4.31407	2.69223
	0.445453	6.46438	1.05977
	0.265321	3.54954	0.806151
	0.524573	1.929	0.748275
	0.590903	7.54691	0.778405
	0.927973	4.20482	1.10008
	0.580932	2.16224	0.775153
	1.70074	2.16115	0.121822
	0.708823	3.4457	0.886788
	3.02648	4.92231	0.613446
	0.222185	7.75891	0.225436
	1.40464	2.93717	0.666554
	1.14019	3.83437	0.763882
	0.852756	2.43449	0.631655
	0.601091	6.49386	1.59323
	0.154987	5.69291	0.62927
	2.44577	0.278327	0.930574
	0.753694	4.31016	0.437216
	0.7305	2.47199	0.609328
	0.438083	5.29537	1.56093
	0.464312	2.0829	0.014523
	0.143932	4.73589	0.326882
	1.17292	1.45992	0.44632
	1.40486	2.83486	0.800082
	0.0695817	5.02181	0.800732
	0.513301	5.0541	0.590469
	0.655932	3.18103	0.477534
	0.481003	3.41124	0.361782
	0.855573	3.5788	0.769951
	0.718578	2.1191	2.27669
	0.539963	4.45713	2.06643
	0.625802	2.34063	0.975228
	1.83687	2.25891	0.937511
	1.10182	2.27452	0.480352
	0.883103	4.25142	0.923638
	0.817423	3.73595	1.06974
	1.19329	2.95105	0.85449
	1.00362	10.8628	0.623201
	1.41505	7.0258	0.86186
	1.21064	1.63051	1.13932
	0.764965	4.33748	0.955502
	0.646395	4.01797	0.534761
	1.3058	3.89528	0.745457
	1.7118	4.31884	1.0253
	0.246246	2.91029	1.43239
	1.57762	2.9259	0.983899
	0.660051	1.8347	1.18809
	1.02595	9.78328	0.484254
	0.57833	8.73955	1.60255

## Sheet: Figure supplement 1
	WT	dKO
	25	16
	17	20
	24	17
	25	18
	14	20
	16	20
	17	23
	24	23
	21	19
	15	22

## Sheet: Figure supplement 2
	N2			dtn-1			dtn-2
	X	Y		X	Y		X	Y
	0	2372		0	1416		X	Y
	0.01	2403.56		0.01	1420		0	1922
	0.02	2419.07		0.02	1440		0.01	1889.93
	0.03	2430.61		0.03	1456		0.02	1871.88
	0.04	2425.66		0.04	1478		0.03	1876.15
	0.05	2409.2		0.05	1472		0.04	1894.24
	0.06	2450.34		0.06	1482		0.05	1878.37
	0.07	2458.93		0.07	1510		0.06	1862.51
	0.08	2407.46		0.08	1522		0.07	1855.91
	0.09	2348.73		0.09	1516		0.08	1835.12
	0.1	2315.71		0.1	1528		0.09	1867.05
	0.11	2343.68		0.11	1536		0.1	1914.72
	0.12	2377.41		0.12	1484		0.11	1906.13
	0.13	2342.15		0.13	1444		0.12	1866.88
	0.14	2293.71		0.14	1460		0.13	1878.42
	0.15	2250.29		0.15	1498		0.14	1932.3
	0.16	2196.63		0.16	1508		0.15	1951.82
	0.17	2205.44		0.17	1502		0.16	1924.78
	0.18	2210.1		0.18	1506		0.17	1916.35
	0.19	2209.95		0.19	1502		0.18	1894.53
	0.2	2205.8		0.2	1496		0.19	1872.54
	0.21	2168.88		0.21	1496		0.2	1942.65
	0.22	2130.93		0.22	1498		0.21	1946.3
	0.23	2107.9		0.23	1478		0.22	1908.37
	0.24	2102.29		0.24	1442		0.23	1897.01
	0.25	2072.51		0.25	1448		0.24	1854.21
	0.26	2025.76		0.26	1456		0.25	1838.48
	0.27	2030.22		0.27	1432		0.26	1852.84
	0.28	2060.78		0.28	1438		0.27	1829.05
	0.29	2093.73		0.29	1476		0.28	1835.62
	0.3	2119.37		0.3	1476		0.29	1891.42
	0.31	2113.37		0.31	1440		0.3	1877.08
	0.32	2101.95		0.32	1422		0.31	1816.26
	0.33	2107.54		0.33	1442		0.32	1776.12
	0.34	2099.76		0.34	1450		0.33	1778.02
	0.35	2119.56		0.35	1432		0.34	1774
	0.36	2151.27		0.36	1414		0.35	1746.3
	0.37	2172.39		0.37	1412		0.36	1732.19
	0.38	2196.2		0.38	1438		0.37	1739.4
	0.39	2218.39		0.39	1404		0.38	1732.78
	0.4	2217.76		0.4	1328		0.39	1754.27
	0.41	2163		0.41	1336		0.4	1764.22
	0.42	2127.27		0.42	1384		0.41	1742.53
	0.43	2163.73		0.43	1398		0.42	1733.4
	0.44	2191.17		0.44	1380		0.43	1727.39
	0.45	2184.59		0.45	1372		0.44	1711.44
	0.46	2170.98		0.46	1348		0.45	1729.79
	0.47	2158.34		0.47	1306		0.46	1769.53
	0.48	2153.9		0.48	1302		0.47	1743.43
	0.49	2144.37		0.49	1320		0.48	1712.25
	0.5	2148.49		0.5	1342		0.49	1690.21
	0.51	2106.9		0.51	1382		0.5	1682.45
	0.52	2069.37		0.52	1416		0.51	1699.46
	0.53	2038.05		0.53	1428		0.52	1740.41
	0.54	1978.05		0.54	1420		0.53	1774.13
	0.55	1964.37		0.55	1438		0.54	1787.94
	0.56	2001.76		0.56	1482		0.55	1798.69
	0.57	2081.41		0.57	1504		0.56	1829.36
	0.58	2135.8		0.58	1536		0.57	1857.92
	0.59	2136.76		0.59	1542		0.58	1815.3
	0.6	2129.37		0.6	1538		0.59	1754
	0.61	2143.9		0.61	1552		0.6	1759.98
	0.62	2150.98		0.62	1552		0.61	1830.36
	0.63	2138.34		0.63	1518		0.62	1898.72
	0.64	2147.9		0.64	1466		0.63	1958.34
	0.65	2163.39		0.65	1472		0.64	1971.78
	0.66	2179.02		0.66	1500		0.65	1928.89
	0.67	2202.41		0.67	1494		0.66	1876.77
	0.68	2225.41		0.68	1488		0.67	1859.41
	0.69	2215.27		0.69	1518		0.68	1858.83
	0.7	2210.34		0.7	1546		0.69	1894.07
	0.71	2207.88		0.71	1570		0.7	1949.11
	0.72	2227.95		0.72	1582		0.71	1978.27
	0.73	2278.41		0.73	1544		0.72	1970
	0.74	2313.32		0.74	1506		0.73	1964.89
	0.75	2288.73		0.75	1570		0.74	1963.61
	0.76	2252.1		0.76	1630		0.75	1954.85
	0.77	2263.12		0.77	1590		0.76	1983.53
	0.78	2302.93		0.78	1580		0.77	2030.38
	0.79	2299.54		0.79	1614		0.78	2025.79
	0.8	2289.32		0.8	1624		0.79	1995.68
	0.81	2298.07		0.81	1632		0.8	1988.27
	0.82	2266		0.82	1662		0.81	2015.17
	0.83	2247.83		0.83	1678		0.82	2048.03
	0.84	2267.37		0.84	1662		0.83	2042.83
	0.85	2278		0.85	1656		0.84	2049.36
	0.86	2316.49		0.86	1662		0.85	2065.2
	0.87	2348.49		0.87	1656		0.86	2082.32
	0.88	2331.27		0.88	1678		0.87	2067.08
	0.89	2287.95		0.89	1732		0.88	2089.95
	0.9	2296.83		0.9	1728		0.89	2142.2
	0.91	2335.56		0.91	1706		0.9	2141.51
	0.92	2326.73		0.92	1684		0.91	2139.66
	0.93	2334.8		0.93	1666		0.92	2158.88
	0.94	2351.95		0.94	1672		0.93	2164.52
	0.95	2366.83		0.95	1714		0.94	2160.86
	0.96	2373.56		0.96	1748		0.95	2156.31
	0.97	2313.05		0.97	1740		0.96	2137
	0.98	2232.93		0.98	1728		0.97	2134.87
	0.99	2188.68		0.99	1688		0.98	2131.06
	1	2193.37		1	1692		0.99	2126.02
	1.01	2249.22		1.01	1770		1	2173.92
	1.02	2261.17		1.02	1786		1.01	2214.32
	1.03	2204.41		1.03	1726		1.02	2193.24
	1.04	2187.56		1.04	1690		1.03	2170.28
	1.05	2222.29		1.05	1718		1.04	2152.23
	1.06	2235.71		1.06	1778		1.05	2096.55
	1.07	2212.95		1.07	1808		1.06	2064.67
	1.08	2200.1		1.08	1802		1.07	2069.28
	1.09	2201.98		1.09	1758		1.08	2066
	1.1	2201.46		1.1	1702		1.09	2074.55
	1.11	2198.93		1.11	1674		1.1	2086.68
	1.12	2184.49		1.12	1666		1.11	2107.85
	1.13	2201.73		1.13	1678		1.12	2147.28
	1.14	2251.12		1.14	1692		1.13	2160
	1.15	2303.66		1.15	1724		1.14	2122.3
	1.16	2316.1		1.16	1752		1.15	2109.8
	1.17	2305.1		1.17	1784		1.16	2132.13
	1.18	2294.78		1.18	1810		1.17	2152.89
	1.19	2343.41		1.19	1782		1.18	2158
	1.2	2371.41		1.2	1706		1.19	2173.91
	1.21	2364.27		1.21	1646		1.2	2210.47
	1.22	2358.59		1.22	1652		1.21	2207.65
	1.23	2315		1.23	1698		1.22	2185.43
	1.24	2227.12		1.24	1730		1.23	2188.65
	1.25	2206.1		1.25	1722		1.24	2221.36
	1.26	2238.49		1.26	1688		1.25	2251.36
	1.27	2253.15		1.27	1702		1.26	2240.47
	1.28	2229.02		1.28	1724		1.27	2224.18
	1.29	2216.63		1.29	1672		1.28	2216
	1.3	2199.9		1.3	1600		1.29	2191.89
	1.31	2157.17		1.31	1510		1.3	2181.55
	1.32	2144.88		1.32	1408		1.31	2217.26
	1.33	2147.46		1.33	1352		1.32	2260.1
	1.34	2156.49		1.34	1388		1.33	2269.57
	1.35	2125.85		1.35	1490		1.34	2258.44
	1.36	2108.59		1.36	1558		1.35	2263.85
	1.37	2120.63		1.37	1638		1.36	2264.61
	1.38	2093.27		1.38	1672		1.37	2225.34
	1.39	2043.66		1.39	1656		1.38	2209.99
	1.4	2016		1.4	1680		1.39	2218.2
	1.41	2044.63		1.41	1698		1.4	2223.83
	1.42	2059.61		1.42	1694		1.41	2232.86
	1.43	2025.02		1.43	1716		1.42	2221.81
	1.44	1990.05		1.44	1736		1.43	2199.05
	1.45	2009.22		1.45	1686		1.44	2162.74
	1.46	2071.76		1.46	1672		1.45	2114.47
	1.47	2121.32		1.47	1676		1.46	2134.2
	1.48	2131.61		1.48	1688		1.47	2189.23
	1.49	2115.46		1.49	1676		1.48	2194.8
	1.5	2116.05		1.5	1614		1.49	2159.74
	1.51	2111.46		1.51	1580		1.5	2139.71
	1.52	2077.37		1.52	1604		1.51	2146.2
	1.53	2053.73		1.53	1580		1.52	2176.33
	1.54	2047.56		1.54	1576		1.53	2171.3
	1.55	2022.27		1.55	1610		1.54	2140.98
	1.56	2043.71		1.56	1578		1.55	2089.89
	1.57	2122.54		1.57	1544		1.56	2081.9
	1.58	2142.63		1.58	1542		1.57	2093.36
	1.59	2140.41		1.59	1526		1.58	2074.58
	1.6	2147.95		1.6	1486		1.59	2051.2
	1.61	2110.22		1.61	1440		1.6	2053.45
	1.62	2077.76		1.62	1436		1.61	2063.15
	1.63	2106.88		1.63	1440		1.62	2083.39
	1.64	2148		1.64	1400		1.63	2107.67
	1.65	2143.85		1.65	1390		1.64	2083.92
	1.66	2116.44		1.66	1380		1.65	2071.93
	1.67	2096.95		1.67	1356		1.66	2099.64
	1.68	2077.61		1.68	1370		1.67	2087.73
	1.69	2041.32		1.69	1352		1.68	2058.09
	1.7	2015.66		1.7	1288		1.69	2079.12
	1.71	2034.46		1.71	1238		1.7	2105
	1.72	2018.83		1.72	1242		1.71	2102.89
	1.73	1960.9		1.73	1280		1.72	2091.9
	1.74	1931.76		1.74	1290		1.73	2041.9
	1.75	1931.07		1.75	1260		1.74	1988.31
	1.76	1919.46		1.76	1230		1.75	1990.17
	1.77	1874.41		1.77	1224		1.76	2014.84
	1.78	1806.93		1.78	1212		1.77	2019.39
	1.79	1786.93		1.79	1208		1.78	1972.52
	1.8	1797.95		1.8	1208		1.79	1962.06
	1.81	1781.59		1.81	1200		1.8	2011.74
	1.82	1754.88		1.82	1174		1.81	2012.99
	1.83	1734.15		1.83	1162		1.82	1962.81
	1.84	1735.17		1.84	1184		1.83	1955.55
	1.85	1727.44		1.85	1178		1.84	1965.42
	1.86	1705.76		1.86	1178		1.85	1965.75
	1.87	1715.61		1.87	1192		1.86	1951.05
	1.88	1736.34		1.88	1150		1.87	1912
	1.89	1789.63		1.89	1112		1.88	1866
	1.9	1825.71		1.9	1108		1.89	1836.6
	1.91	1818.83		1.91	1112		1.9	1830.17
	1.92	1793.41		1.92	1146		1.91	1796.78
	1.93	1760.37		1.93	1158		1.92	1788.32
	1.94	1713.61		1.94	1138		1.93	1784.27
	1.95	1718.22		1.95	1114		1.94	1794.51
	1.96	1757.12		1.96	1084		1.95	1789.19
	1.97	1783.59		1.97	1072		1.96	1751.19
	1.98	1814.73		1.98	1072		1.97	1731.93
	1.99	1824.95		1.99	1072		1.98	1732.78
	2	1830.54		2	1088		1.99	1728.74
	2.01	1848.66		2.01	1038		2	1701.41
	2.02	1877.22		2.02	1008		2.01	1684.89
	2.03	1890.29		2.03	1080		2.02	1676.18
	2.04	1901.32		2.04	1092		2.03	1674.81
	2.05	1927		2.05	1036		2.04	1699.76
	2.06	1921.71		2.06	1022		2.05	1705.97
	2.07	1892.76		2.07	1058		2.06	1700
	2.08	1885.27		2.08	1092		2.07	1704.07
	2.09	1899.15		2.09	1088		2.08	1722.12
	2.1	1877.41		2.1	1048		2.09	1734
	2.11	1835.41		2.11	1042		2.1	1703.66
	2.12	1813.02		2.12	1042		2.11	1684
	2.13	1793.51		2.13	1024		2.12	1688.8
	2.14	1754.63		2.14	1056		2.13	1668.1
	2.15	1710.76		2.15	1074		2.14	1625.18
	2.16	1722.54		2.16	1060		2.15	1634.16
	2.17	1759.63		2.17	1030		2.16	1651.63
	2.18	1769.95		2.18	1004		2.17	1629.4
	2.19	1755.29		2.19	1010		2.18	1627.11
	2.2	1732		2.2	1040		2.19	1636.65
	2.21	1734.17		2.21	1044		2.2	1642.67
	2.22	1779.66		2.22	1032		2.21	1606
	2.23	1792.32		2.23	1010		2.22	1563.81
	2.24	1739.85		2.24	992		2.23	1534.31
	2.25	1712.51		2.25	1006		2.24	1506.04
	2.26	1728.29		2.26	1018		2.25	1488.64
	2.27	1718.05		2.27	982		2.26	1495.49
	2.28	1678.83		2.28	936		2.27	1508.16
	2.29	1632.76		2.29	958		2.28	1500.67
	2.3	1649.61		2.3	996		2.29	1494.98
	2.31	1704.71		2.31	990		2.3	1479.94
	2.32	1707.56		2.32	968		2.31	1452.51
	2.33	1689.46		2.33	974		2.32	1446.67
	2.34	1697.71		2.34	990		2.33	1463.99
	2.35	1734.15		2.35	962		2.34	1462
	2.36	1743.12		2.36	928		2.35	1419.71
	2.37	1751.98		2.37	914		2.36	1365.74
	2.38	1774.49		2.38	892		2.37	1344
	2.39	1784.71		2.39	886		2.38	1357.06
	2.4	1767.9		2.4	898		2.39	1354.41
	2.41	1729.32		2.41	890		2.4	1326.98
	2.42	1728		2.42	866		2.41	1302.7
	2.43	1737.83		2.43	864		2.42	1315.75
	2.44	1719.66		2.44	866		2.43	1314.64
	2.45	1680.56		2.45	888		2.44	1300.27
	2.46	1686		2.46	890		2.45	1290.04
	2.47	1685.22		2.47	880		2.46	1275.91
	2.48	1710.39		2.48	870		2.47	1297.02
	2.49	1721.88		2.49	862		2.48	1323.97
	2.5	1688.15		2.5	822		2.49	1329.78
	2.51	1671.02		2.51	810		2.5	1334.72
	2.52	1674.73		2.52	806		2.51	1332.64
	2.53	1705.49		2.53	806		2.52	1269.06
	2.54	1744.68		2.54	824		2.53	1229.84
	2.55	1782.02		2.55	832		2.54	1287.62
	2.56	1812.78		2.56	830		2.55	1316.2
	2.57	1855.59		2.57	824		2.56	1292.43
	2.58	1849.12		2.58	826		2.57	1297.39
	2.59	1836.63		2.59	846		2.58	1306.09
	2.6	1867.02		2.6	862		2.59	1269.96
	2.61	1911.46		2.61	854		2.6	1258.71
	2.62	1926.34		2.62	858		2.61	1283.87
	2.63	1919.24		2.63	840		2.62	1280.74
	2.64	1907.76		2.64	806		2.63	1268.41
	2.65	1899.71		2.65	816		2.64	1303.63
	2.66	1884.49		2.66	864		2.65	1314.55
	2.67	1865.07		2.67	870		2.66	1301.57
	2.68	1883.61		2.68	854		2.67	1316.72
	2.69	1910		2.69	852		2.68	1329.03
	2.7	1902.1		2.7	848		2.69	1342.52
	2.71	1858.71		2.71	854		2.7	1327.54
	2.72	1846.54		2.72	870		2.71	1303.3
	2.73	1865.41		2.73	878		2.72	1321.92
	2.74	1890.39		2.74	878		2.73	1352.51
	2.75	1887.39		2.75	884		2.74	1357.99
	2.76	1816.15		2.76	876		2.75	1341.97
	2.77	1729.46		2.77	854		2.76	1334.64
	2.78	1697.32		2.78	864		2.77	1340.41
	2.79	1694.78		2.79	872		2.78	1339.32
	2.8	1648.15		2.8	860		2.79	1330.78
	2.81	1612.27		2.81	864		2.8	1312.77
	2.82	1627.76		2.82	856		2.81	1276.42
	2.83	1630		2.83	848		2.82	1271.14
	2.84	1599.41		2.84	842		2.83	1307.03
	2.85	1580.56		2.85	846		2.84	1310.19
	2.86	1543.81		2.86	878		2.85	1291.46
	2.87	1524		2.87	884		2.86	1267.82
	2.88	1519.85		2.88	842		2.87	1220.98
	2.89	1482.46		2.89	812		2.88	1178.99
	2.9	1474.49		2.9	792		2.89	1162.43
	2.91	1503.41		2.91	786		2.9	1166
	2.92	1496		2.92	810		2.91	1164.77
	2.93	1485.73		2.93	798		2.92	1133.05
	2.94	1510		2.94	764		2.93	1106.5
	2.95	1514.37		2.95	772		2.94	1123.45
	2.96	1481.76		2.96	766		2.95	1126.76
	2.97	1446		2.97	744		2.96	1076.02
	2.98	1443.66		2.98	746		2.97	1022.84
	2.99	1482.12		2.99	750		2.98	1009.31
	3	1516.1		3	722		2.99	1027.28
	3.01	1536.61		3.01	714		3	1052.59
	3.02	1512.34		3.02	724		3.01	1067.02
	3.03	1489.76		3.03	710		3.02	1060.6
	3.04	1535.51		3.04	696		3.03	1044.53
	3.05	1575.37		3.05	674		3.04	1042
	3.06	1581.37		3.06	660		3.05	1032
	3.07	1601.49		3.07	658		3.06	1009.4
	3.08	1626.49		3.08	646		3.07	986
	3.09	1638.02		3.09	620		3.08	984.426
	3.1	1634.83		3.1	608		3.09	977.325
	3.11	1640.15		3.11	624		3.1	970.693
	3.12	1674.59		3.12	614		3.11	987.751
	3.13	1706.78		3.13	582		3.12	976
	3.14	1722.29		3.14	560		3.13	981.86
	3.15	1711.76		3.15	562		3.14	988.541
	3.16	1733.56		3.16	596		3.15	992.979
	3.17	1692.12		3.17	586		3.16	1003.37
	3.18	1650.05		3.18	536		3.17	990.584
	3.19	1687.61		3.19	550		3.18	972.401
	3.2	1724.05		3.2	560		3.19	993.878
	3.21	1755.32		3.21	552		3.2	1007.89
	3.22	1760.98		3.22	530		3.21	1023.03
	3.23	1774.54		3.23	524		3.22	1040.55
	3.24	1779.81		3.24	506		3.23	1033.27
	3.25	1765.78		3.25	498		3.24	1031.76
	3.26	1748.88		3.26	526		3.25	1038.1
	3.27	1723.56		3.27	536		3.26	1028.4
	3.28	1696		3.28	514		3.27	994.34
	3.29	1690.34		3.29	508		3.28	954.122
	3.3	1724.44		3.3	516		3.29	942
	3.31	1730.15		3.31	510		3.3	965.842
	3.32	1730.68		3.32	500		3.31	957.416
	3.33	1702.37		3.33	508		3.32	913.453
	3.34	1682.68		3.34	514		3.33	925.465
	3.35	1704		3.35	502		3.34	953.027
	3.36	1743.56		3.36	496		3.35	937.271
	3.37	1711.12		3.37	506		3.36	931.66
	3.38	1643.37		3.38	500		3.37	963.319
	3.39	1605.71		3.39	470		3.38	952.796
	3.4	1644.59		3.4	428		3.39	903.514
	3.41	1715.39		3.41	418		3.4	895.064
	3.42	1738.1		3.42	428		3.41	893.52
	3.43	1772.93		3.43	444		3.42	852.103
	3.44	1808.39		3.44	448		3.43	826.809
	3.45	1824.19		3.45	460		3.44	836.359
	3.46	1830.93		3.46	470		3.45	818.195
	3.47	1867.41		3.47	468		3.46	791.654
	3.48	1943.41		3.48	470		3.47	806.657
	3.49	1980.17		3.49	468		3.48	825.307
	3.5	1967.95		3.5	462		3.49	825.757
	3.51	1972.41		3.51	468		3.5	813.234
	3.52	2008.44		3.52	460		3.51	801.325
	3.53	2021.12		3.53	452		3.52	802.043
	3.54	2042.39		3.54	456		3.53	822.875
	3.55	2059.29		3.55	446		3.54	834.255
	3.56	2046.88		3.56	440		3.55	826.845
	3.57	2017.32		3.57	450		3.56	817.641
	3.58	2021.32		3.58	466		3.57	837.064
	3.59	2059.24		3.59	474		3.58	865.878
	3.6	2085.22		3.6	478		3.59	869.459
	3.61	2110.8		3.61	476		3.6	862.869
	3.62	2120.83		3.62	470		3.61	862
	3.63	2120		3.63	476		3.62	836.815
	3.64	2079.51		3.64	484		3.63	815.027
	3.65	2066.63		3.65	474		3.64	846.979
	3.66	2090.24		3.66	452		3.65	861.812
	3.67	2113.12		3.67	452		3.66	840.851
	3.68	2093.76		3.68	480		3.67	853.69
	3.69	2112		3.69	472		3.68	878.31
	3.7	2112.49		3.7	440		3.69	861.623
	3.71	2085.95		3.71	438		3.7	859.508
	3.72	2067.27		3.72	440		3.71	863.957
	3.73	2043.41		3.73	432		3.72	852.432
	3.74	2040.05		3.74	432		3.73	845.86
	3.75	2058.29		3.75	440		3.74	853.076
	3.76	2072.39		3.76	450		3.75	846.729
	3.77	2070.76		3.77	458		3.76	812.286
	3.78	2064.44		3.78	448		3.77	789.416
	3.79	2097.24		3.79	440		3.78	790.766
	3.8	2113.02		3.8	434		3.79	777.216
	3.81	2127.39		3.81	428		3.8	741.52
	3.82	2157.17		3.82	406		3.81	731.368
	3.83	2180.73		3.83	390		3.82	733.289
	3.84	2217.85		3.84	382		3.83	703.909
	3.85	2211.2		3.85	366		3.84	669.35
	3.86	2220.29		3.86	364		3.85	685.191
	3.87	2229.9		3.87	382		3.86	692.219
	3.88	2215.56		3.88	396		3.87	676.59
	3.89	2169.95		3.89	396		3.88	669.173
	3.9	2128.98		3.9	392		3.89	654.377
	3.91	2145.07		3.91	380		3.9	652.067
	3.92	2159.12		3.92	370		3.91	664.723
	3.93	2194.15		3.93	362		3.92	687.872
	3.94	2229.07		3.94	344		3.93	684.328
	3.95	2252.93		3.95	352		3.94	665.356
	3.96	2221.37		3.96	382		3.95	658.359
	3.97	2186.32		3.97	356		3.96	644.967
	3.98	2216.29		3.98	324		3.97	647.599
	3.99	2258.68		3.99	326		3.98	672.45
	4	2318.39		4	330		3.99	674.851
	4.01	2344.61		4.01	332		4	658.59
	4.02	2346.2		4.02	358		4.01	652.498
	4.03	2374.29		4.03	368		4.02	658.45
	4.04	2422.98		4.04	340		4.03	672.699
	4.05	2446.61		4.05	316		4.04	671.647
	4.06	2473.37		4.06	338		4.05	672.608
	4.07	2524.95		4.07	360		4.06	675.277
	4.08	2536.59		4.08	374		4.07	673.033
	4.09	2524.12		4.09	380		4.08	676.474
	4.1	2480		4.1	386		4.09	689.082
	4.11	2498.17		4.11	406		4.1	702
	4.12	2536.15		4.12	410		4.11	703.015
	4.13	2524.37		4.13	412		4.12	730.9
	4.14	2535.9		4.14	424		4.13	765.787
	4.15	2559.88		4.15	440		4.14	774
	4.16	2540.59		4.16	448		4.15	778.954
	4.17	2514.8		4.17	444		4.16	798.827
	4.18	2466.63		4.18	444		4.17	815.21
	4.19	2436		4.19	434		4.18	822.492
	4.2	2445.07		4.2	430		4.19	836.942
	4.21	2448.1		4.21	450		4.2	832.426
	4.22	2447.32		4.22	440		4.21	828.644
	4.23	2485.34		4.23	416		4.22	813.739
	4.24	2522.54		4.24	406		4.23	794.857
	4.25	2541.83		4.25	420		4.24	789.38
	4.26	2571.37		4.26	440		4.25	788.997
	4.27	2614.29		4.27	432		4.26	776.821
	4.28	2660.05		4.28	402		4.27	765.191
	4.29	2665.51		4.29	388		4.28	756.407
	4.3	2669.02		4.3	384		4.29	740.079
	4.31	2696.34		4.31	396		4.3	738.14
	4.32	2696.24		4.32	406		4.31	741.441
	4.33	2703.85		4.33	402		4.32	736.766
	4.34	2736.83		4.34	420		4.33	724.529
	4.35	2793.12		4.35	446		4.34	718.17
	4.36	2840.1		4.36	420		4.35	717.289
	4.37	2895.39		4.37	394		4.36	722
	4.38	2877.71		4.38	384		4.37	705.374
	4.39	2838.1		4.39	378		4.38	697.374
	4.4	2884.34		4.4	404		4.39	707.325
	4.41	2903.29		4.41	440		4.4	716.195
	4.42	2847.95		4.42	456		4.41	723.702
	4.43	2811.68		4.43	464		4.42	751.131
	4.44	2803.51		4.44	462		4.43	772.298
	4.45	2786.05		4.45	446		4.44	775.593
	4.46	2804.24		4.46	436		4.45	754.693
	4.47	2798.63		4.47	446		4.46	720.267
	4.48	2760.24		4.48	456		4.47	728.043
	4.49	2732.83		4.49	460		4.48	735.362
	4.5	2687.66		4.5	454		4.49	738.213
	4.51	2685		4.51	456		4.5	744.413
	4.52	2726.1		4.52	454		4.51	730.517
	4.53	2777.07		4.53	436		4.52	710.523
	4.54	2801.27		4.54	436		4.53	699.477
	4.55	2808.07		4.55	444		4.54	686.079
	4.56	2814.49		4.56	454		4.55	668.468
	4.57	2788.61		4.57	464		4.56	653.824
	4.58	2776.2		4.58	448		4.57	654.219
	4.59	2783.54		4.59	440		4.58	654.158
	4.6	2736.98		4.6	444		4.59	642.097
	4.61	2701.51		4.61	424		4.6	612.036
	4.62	2672.59		4.62	416		4.61	597.581
	4.63	2687.29		4.63	424		4.62	601.915
	4.64	2732.05		4.64	418		4.63	589.112
	4.65	2720.56		4.65	398		4.64	574.924
	4.66	2663.17		4.66	408		4.65	568.346
	4.67	2616.17		4.67	418		4.66	570.669
	4.68	2568.24		4.68	406		4.67	571.678
	4.69	2528		4.69	396		4.68	552.62
	4.7	2550.54		4.7	408		4.69	531.404
	4.71	2631.54		4.71	430		4.7	521.714
	4.72	2644.34		4.72	434		4.71	525.264
	4.73	2572.78		4.73	422		4.72	535.386
	4.74	2493.8		4.74	406		4.73	534.754
	4.75	2489.51		4.75	392		4.74	520.237
	4.76	2492.39		4.76	384		4.75	508.45
	4.77	2512.39		4.77	382		4.76	527.787
	4.78	2479.07		4.78	382		4.77	543.799
	4.79	2458.83		4.79	378		4.78	549.812
	4.8	2455.07		4.8	392		4.79	547.41
	4.81	2414.12		4.81	422		4.8	547.97
	4.82	2376.29		4.82	418		4.81	550.152
	4.83	2393.78		4.83	404		4.82	532.742
	4.84	2397.51		4.84	408		4.83	534.468
	4.85	2414.27		4.85	410		4.84	531.191
	4.86	2436.44		4.86	416		4.85	514.723
	4.87	2395.93		4.87	414		4.86	499.094
	4.88	2364.68		4.88	398		4.87	514.474
	4.89	2397.8		4.89	414		4.88	530.134
	4.9	2413.07		4.9	422		4.89	522
	4.91	2377.85		4.91	396		4.9	495.745
	4.92	2414		4.92	378		4.91	481.696
	4.93	2450.05		4.93	380		4.92	493.854
	4.94	2426.73		4.94	386		4.93	503.976
	4.95	2416.49		4.95	394		4.94	502.036
	4.96	2395.12		4.96	398		4.95	495.964
	4.97	2405.95		4.97	394		4.96	501.939
	4.98	2456.05		4.98	392		4.97	530.085
	4.99	2422.56		4.99	402		4.98	549.945
	5	2350.29		5	412		4.99	540.067
	5.01	2341.05		5.01	400		5	516.316
	5.02	2354.15		5.02	392		5.01	502.821
	5.03	2364.56		5.03	404		5.02	495.654
	5.04	2340.44		5.04	414		5.03	500.079
	5.05	2315.9		5.05	416		5.04	513.66
	5.06	2343.9		5.06	406		5.05	538.699
	5.07	2333.8		5.07	402		5.06	554.76
	5.08	2323.8		5.08	400		5.07	545.97
	5.09	2326.63		5.09	412		5.08	551.41
	5.1	2308.78		5.1	444		5.09	572.377
	5.11	2308.2		5.11	456		5.1	607.003
	5.12	2314.05		5.12	420		5.11	637.489
	5.13	2311.51		5.13	376		5.12	638.45
	5.14	2296.05		5.14	370		5.13	639.052
	5.15	2241.27		5.15	388		5.14	645.502
	5.16	2191.22		5.16	412		5.15	629.046
	5.17	2151.05		5.17	430		5.16	622.821
	5.18	2110.93		5.18	428		5.17	646
	5.19	2147.1		5.19	424		5.18	683.702
	5.2	2178.1		5.2	430		5.19	713.07
	5.21	2141.41		5.21	424		5.2	734.778
	5.22	2171.12		5.22	406		5.21	735.994
	5.23	2201.39		5.23	398		5.22	723.733
	5.24	2144.39		5.24	412		5.23	758.511
	5.25	2069.63		5.25	412		5.24	807.112
	5.26	2042.78		5.26	406		5.25	824.851
	5.27	2064.8		5.27	428		5.26	818.419
	5.28	2108.29		5.28	462		5.27	820
	5.29	2131.85		5.29	472		5.28	830
	5.3	2118.24		5.3	456		5.29	872.705
	5.31	2105.54		5.31	428		5.3	934.669
	5.32	2073.61		5.32	414		5.31	968.632
	5.33	2066		5.33	422		5.32	949.532
	5.34	2078.88		5.34	424		5.33	918.243
	5.35	2061.44		5.35	422		5.34	887.818
	5.36	2023.9		5.36	432		5.35	884.578
	5.37	2045.56		5.37	440		5.36	911.55
	5.38	2031.76		5.38	452		5.37	919.356
	5.39	2059.41		5.39	476		5.38	919.295
	5.4	2083.66		5.4	510		5.39	922.34
	5.41	2083.98		5.41	514		5.4	914.827
	5.42	2086.29		5.42	486		5.41	908.085
	5.43	2042.78		5.43	474		5.42	945.897
	5.44	1988.59		5.44	484		5.43	995.593
	5.45	2031.98		5.45	490		5.44	1000.02
	5.46	2083.07		5.46	506		5.45	967.739
	5.47	2088.05		5.47	510		5.46	919.362
	5.48	2104.83		5.48	508		5.47	895.155
	5.49	2136.95		5.49	506		5.48	898.626
	5.5	2150.73		5.5	502		5.49	900.723
	5.51	2146.32		5.51	486		5.5	879.678
	5.52	2143.76		5.52	478		5.51	859.38
	5.53	2110.93		5.53	480		5.52	843.69
	5.54	2080.63		5.54	470		5.53	831.277
	5.55	2067.51		5.55	478		5.54	810.207
	5.56	2065.9		5.56	508		5.55	778.225
	5.57	2027.56		5.57	526		5.56	769.398
	5.58	1987.71		5.58	532		5.57	785.264
	5.59	1983.98		5.59	546		5.58	811.489
	5.6	1950.63		5.6	544		5.59	813.964
	5.61	1942.63		5.61	516		5.6	800.085
	5.62	1947.51		5.62	504		5.61	789.641
	5.63	1942		5.63	514		5.62	786.498
	5.64	1896.83		5.64	526		5.63	785.605
	5.65	1829.59		5.65	520		5.64	801.143
	5.66	1812.05		5.66	516		5.65	806.608
	5.67	1786.85		5.67	530		5.66	786.881
	5.68	1754.93		5.68	526		5.67	773.957
	5.69	1700.15		5.69	510		5.68	806.225
	5.7	1629.22		5.7	522		5.69	848.985
	5.71	1603.32		5.71	546		5.7	852.839
	5.72	1598.44		5.72	544		5.71	843.52
	5.73	1560.24		5.73	538		5.72	850
	5.74	1526		5.74	566		5.73	853.866
	5.75	1517.93		5.75	592		5.74	848.128
	5.76	1492.49		5.76	596		5.75	831.082
	5.77	1491.85		5.77	604		5.76	815.988
	5.78	1490.93		5.78	608		5.77	811.076
	5.79	1454.61		5.79	602		5.78	803.191
	5.8	1415.66		5.8	600		5.79	797.119
	5.81	1421.12		5.81	598		5.8	806.948
	5.82	1422.05		5.82	594		5.81	827.617
	5.83	1443.68		5.83	598		5.82	832.468
	5.84	1457.81		5.84	620		5.83	834
	5.85	1403.37		5.85	630		5.84	850.103
	5.86	1353.02		5.86	614		5.85	846.462
	5.87	1326.98		5.87	616		5.86	825.374
	5.88	1298.1		5.88	634		5.87	820.274
	5.89	1265.66		5.89	638		5.88	815.489
	5.9	1223.51		5.9	634		5.89	811.933
	5.91	1167.73		5.91	632		5.9	822.559
	5.92	1146.59		5.92	644		5.91	835.556
	5.93	1108.95		5.93	670		5.92	824.815
	5.94	1107.51		5.94	682		5.93	815.532
	5.95	1111.44		5.95	662		5.94	797.666
	5.96	1088.59		5.96	638		5.95	774.34
	5.97	1068.27		5.97	642		5.96	736.723
	5.98	1048.88		5.98	642		5.97	722
	5.99	1031.76		5.99	616		5.98	738.754
	6	979.219		6	602		5.99	738.195
	6.01	933.171		6.01	622		6	730.346
	6.02	938.146		6.02	634		6.01	722.614
	6.03	927.195		6.03	616		6.02	720.638
	6.04	898.439		6.04	602		6.03	701.343
	6.05	879.122		6.05	606		6.04	668.626
	6.06	854.146		6.06	620		6.05	650
	6.07	830.854		6.07	626		6.06	647.264
	6.08	852.634		6.08	634		6.07	618.201
	6.09	854.561		6.09	646		6.08	569.903
	6.1	818.39		6.1	664		6.09	562.553
	6.11	780.317		6.11	686		6.1	571.167
	6.12	757.902		6.12	700		6.11	552.857
	6.13	753.219		6.13	686		6.12	531.678
	6.14	724.927		6.14	690		6.13	528.188
	6.15	697		6.15	724		6.14	511.465
	6.16	683.024		6.16	748		6.15	479.909
	6.17	652.195		6.17	772		6.16	482.553
	6.18	650.293		6.18	802		6.17	510.985
	6.19	669.878		6.19	808		6.18	505.945
	6.2	676.585		6.2	794		6.19	489.629
	6.21	664.049		6.21	816		6.2	488.304
	6.22	640.878		6.22	824		6.21	486
	6.23	635.976		6.23	810		6.22	478.626
	6.24	625.317		6.24	822		6.23	451.277
	6.25	617.732		6.25	832		6.24	434
	6.26	616.195		6.26	822		6.25	453.599
	6.27	621.293		6.27	820		6.26	473.222
	6.28	617.902		6.28	836		6.27	474.492
	6.29	628.805		6.29	872		6.28	458.717
	6.3	627.415		6.3	902		6.29	446.474
	6.31	595.732		6.31	882		6.3	459.617
	6.32	585.317		6.32	862		6.31	463.672
	6.33	568.951		6.33	888		6.32	456.948
	6.34	558.39		6.34	918		6.33	475.088
	6.35	549.951		6.35	944		6.34	500.833
	6.36	555.561		6.36	976		6.35	523.483
	6.37	554.902		6.37	976		6.36	525.593
	6.38	546.098		6.38	962		6.37	522.979
	6.39	531.561		6.39	980		6.38	560.055
	6.4	519.756		6.4	1024		6.39	592.766
	6.41	527.439		6.41	1066		6.4	598.498
	6.42	541.659		6.42	1070		6.41	605.106
	6.43	548.317		6.43	1060		6.42	634.888
	6.44	536.049		6.44	1060		6.43	637.447
	6.45	534.951		6.45	1078		6.44	638.809
	6.46	518.976		6.46	1106		6.45	646.578
	6.47	519.561		6.47	1128		6.46	635.125
	6.48	533.61		6.48	1138		6.47	603.866
	6.49	543.488		6.49	1138		6.48	584
	6.5	521.707		6.5	1134		6.49	578.328
	6.51	502.244		6.51	1134		6.5	576.681
	6.52	496.585		6.52	1142		6.51	552.851
	6.53	476.805		6.53	1166		6.52	504.511
	6.54	482.195		6.54	1208		6.53	478.486
	6.55	497.976		6.55	1260		6.54	482.243
	6.56	488		6.56	1278		6.55	480.036
	6.57	466.317		6.57	1264		6.56	463.805
	6.58	472.683		6.58	1220		6.57	459.818
	6.59	470.732		6.59	1208		6.58	464
	6.6	482		6.6	1224		6.59	453.964
	6.61	499.878		6.61	1236		6.6	445.878
	6.62	483.756		6.62	1246		6.61	443.781
	6.63	467.244		6.63	1284		6.62	422
	6.64	489.171		6.64	1332		6.63	406.304
	6.65	488.22		6.65	1362		6.64	402
	6.66	460.976		6.66	1366		6.65	387.66
	6.67	455.195		6.67	1364		6.66	387.805
	6.68	440.829		6.68	1388		6.67	397.562
	6.69	435.366		6.69	1404		6.68	383.149
	6.7	457.317		6.7	1372		6.69	372.93
	6.71	455.268		6.71	1346		6.7	359.854
	6.72	432.439		6.72	1372		6.71	357.368
	6.73	428.341		6.73	1406		6.72	353.319
	6.74	434.439		6.74	1396		6.73	348.729
	6.75	430.61		6.75	1400		6.74	344
	6.76	423.073		6.76	1446		6.75	318.346
	6.77	410.463		6.77	1504		6.76	316.03
	6.78	410		6.78	1532		6.77	329.228
	6.79	406.244		6.79	1532		6.78	309.271
	6.8	391.756		6.8	1526		6.79	281.574
	6.81	387.049		6.81	1528		6.8	280.28
	6.82	396.537		6.82	1568		6.81	295.119
	6.83	408.61		6.83	1636		6.82	298.584
	6.84	411.366		6.84	1690		6.83	298.736
	6.85	407.293		6.85	1736		6.84	293.161
	6.86	410		6.86	1766		6.85	296.985
	6.87	410.488		6.87	1744		6.86	290.979
	6.88	410.878		6.88	1726		6.87	272.237
	6.89	403.585		6.89	1748		6.88	272.717
	6.9	393.512		6.9	1768		6.89	267.739
	6.91	375.732		6.91	1762		6.9	264.055
	6.92	371.366		6.92	1784		6.91	275.198
	6.93	388.195		6.93	1826		6.92	278.48
	6.94	400.78		6.94	1854		6.93	286.128
	6.95	384.756		6.95	1872		6.94	288.626
	6.96	374.927		6.96	1882		6.95	282.9
	6.97	384		6.97	1866		6.96	277.076
	6.98	399.024		6.98	1856		6.97	284.578
	6.99	419.244		6.99	1878		6.98	294
	7	428.927		7	1916		6.99	276.492
	7.01	420.707		7.01	1956		7	255.574
	7.02	422		7.02	2000		7.01	266.705
	7.03	404.585		7.03	2040		7.02	282.815
	7.04	386		7.04	2042		7.03	289.641
	7.05	384		7.05	2048		7.04	287.119
	7.06	372.585		7.06	2100		7.05	287.143
	7.07	373.073		7.07	2126		7.06	282.085
	7.08	382.341		7.08	2122		7.07	271.191
	7.09	378.683		7.09	2158		7.08	274.432
	7.1	371.024		7.1	2210		7.09	289.581
	7.11	380.122		7.11	2236		7.1	292.426
	7.12	390.488		7.12	2268		7.11	279.933
	7.13	391.537		7.13	2306		7.12	279.313
	7.14	380.634		7.14	2342		7.13	285.337
	7.15	384.951		7.15	2384		7.14	298
	7.16	386.244		7.16	2412		7.15	306
	7.17	380.415		7.17	2428		7.16	304
	7.18	386.634		7.18	2482		7.17	308
	7.19	393.829		7.19	2566		7.18	295.647
	7.2	395.561		7.2	2600		7.19	289.258
	7.21	393.659		7.21	2616		7.2	300.723
	7.22	401.61		7.22	2688		7.21	297.702
	7.23	399.073		7.23	2786		7.22	292.778
	7.24	391.902		7.24	2844		7.23	301.21
	7.25	391.146		7.25	2896		7.24	314.79
	7.26	406.537		7.26	2978		7.25	306
	7.27	432.927		7.27	3068		7.26	287.654
	7.28	451.268		7.28	3138		7.27	290.517
	7.29	444.902		7.29	3172		7.28	302
	7.3	438.439		7.3	3198		7.29	299.137
	7.31	434.805		7.31	3250		7.3	297.374
	7.32	432		7.32	3360		7.31	298.237
	7.33	432.366		7.33	3466		7.32	294.602
	7.34	442.293		7.34	3524		7.33	298.529
	7.35	446.073		7.35	3540		7.34	291.38
	7.36	432.049		7.36	3574		7.35	283.064
	7.37	428.049		7.37	3668		7.36	292
	7.38	442		7.38	3782		7.37	311.04
	7.39	452.073		7.39	3860		7.38	318
	7.4	456.146		7.4	3914		7.39	302.061
	7.41	454.293		7.41	3994		7.4	294.012
	7.42	460.488		7.42	4120		7.41	288.018
	7.43	472.366		7.43	4216		7.42	294.936
	7.44	488.293		7.44	4294		7.43	310
	7.45	504.512		7.45	4406		7.44	302.182
	7.46	497.366		7.46	4510		7.45	288.942
	7.47	504.878		7.47	4584		7.46	295.72
	7.48	515.219		7.48	4670		7.47	310.328
	7.49	527.878		7.49	4786		7.48	306.942
	7.5	538.049		7.5	4924		7.49	310.17
	7.51	533.902		7.51	5086		7.5	303.422
	7.52	526.683		7.52	5242		7.51	300.699
	7.53	527.098		7.53	5378		7.52	324.857
	7.54	523.073		7.54	5526		7.53	330.76
	7.55	535.878		7.55	5670		7.54	314.663
	7.56	548.341		7.56	5836		7.55	322.924
	7.57	570.488		7.57	6072		7.56	339.191
	7.58	604.878		7.58	6320		7.57	353.629
	7.59	620.61		7.59	6600		7.58	345.726
	7.6	604.829		7.6	6920		7.59	322.912
	7.61	602.488		7.61	7192		7.6	334.48
	7.62	621.854		7.62	7456		7.61	335.009
	7.63	616.195		7.63	7804		7.62	344.529
	7.64	617.854		7.64	8184		7.63	362
	7.65	625.805		7.65	8508		7.64	354.578
	7.66	622.293		7.66	8764		7.65	347.805
	7.67	625.317		7.67	9084		7.66	337.252
	7.68	628.098		7.68	9566		7.67	329.976
	7.69	645.39		7.69	10120		7.68	340.699
	7.7	683.951		7.7	10634		7.69	352.796
	7.71	702.927		7.71	11122		7.7	354.723
	7.72	700.732		7.72	11718		7.71	354.122
	7.73	701.366		7.73	12430		7.72	340.772
	7.74	694.049		7.74	13184		7.73	332.796
	7.75	691.146		7.75	14038		7.74	357.283
	7.76	691.61		7.76	14914		7.75	376.225
	7.77	693.219		7.77	15790		7.76	363.477
	7.78	697.707		7.78	16892		7.77	354.34
	7.79	714		7.79	18232		7.78	361.623
	7.8	734.39		7.8	19594		7.79	371.587
	7.81	733.829		7.81	20960		7.8	377.933
	7.82	732.732		7.82	22588		7.81	379.964
	7.83	738.585		7.83	24596		7.82	378.523
	7.84	736.732		7.84	26842		7.83	388
	7.85	719.756		7.85	29156		7.84	387.064
	7.86	723.219		7.86	31586		7.85	380.809
	7.87	742.756		7.87	34101		7.86	379.562
	7.88	734.634		7.88	36431		7.87	398.663
	7.89	701.415		7.89	38817		7.88	418.128
	7.9	668.683		7.9	41989		7.89	420.742
	7.91	641.512		7.91	45967		7.9	412.419
	7.92	643.073		7.92	50037		7.91	424.383
	7.93	660.781		7.93	53477		7.92	445.258
	7.94	689.756		7.94	55991		7.93	440.772
	7.95	712.073		7.95	57789		7.94	427.149
	7.96	707.805		7.96	58921		7.95	409.982
	7.97	706.951		7.97	58819		7.96	409.812
	7.98	712.098		7.98	57563		7.97	416.14
	7.99	711.756		7.99	55839		7.98	417.404
	8	688.195		8	53409		7.99	404.286
	8.01	655.366		8.01	49803		8	408.274
	8.02	622.927		8.02	45397		8.01	412.17
	8.03	627.439		8.03	40709		8.02	408.006
	8.04	647.707		8.04	35813		8.03	413.155
	8.05	667.244		8.05	31058		8.04	420.626
	8.06	669.219		8.06	27046		8.05	409.66
	8.07	653.878		8.07	23624		8.06	400.195
	8.08	631.073		8.08	20558		8.07	390.869
	8.09	603.854		8.09	17942		8.08	406.413
	8.1	601.805		8.1	15858		8.09	421.538
	8.11	609.146		8.11	14058		8.1	414.024
	8.12	615.073		8.12	12372		8.11	394.602
	8.13	615.098		8.13	10920		8.12	396.851
	8.14	592.098		8.14	9928		8.13	410.845
	8.15	581.268		8.15	9192		8.14	397.38
	8.16	573.024		8.16	8600		8.15	381.726
	8.17	554.537		8.17	8188		8.16	371.921
	8.18	539.268		8.18	7836		8.17	373.866
	8.19	531.927		8.19	7476		8.18	349.508
	8.2	530		8.2	7096		8.19	331.787
	8.21	536.341		8.21	6762		8.2	347.97
	8.22	519.122		8.22	6562		8.21	348.018
	8.23	503.537		8.23	6388		8.22	358.03
	8.24	496.049		8.24	6176		8.23	361.994
	8.25	500.976		8.25	5974		8.24	375.945
	8.26	499.707		8.26	5752		8.25	370
	8.27	484		8.27	5510		8.26	344.596
	8.28	475.171		8.28	5336		8.27	336.711
	8.29	474.854		8.29	5260		8.28	344.134
	8.3	462.878		8.3	5192		8.29	336
	8.31	454.171		8.31	5074		8.3	320.365
	8.32	444.439		8.32	4924		8.31	320.517
	8.33	451.707		8.33	4794		8.32	326.231
	8.34	453.122		8.34	4696		8.33	343.745
	8.35	445.488		8.35	4654		8.34	333.581
	8.36	438.244		8.36	4648		8.35	298
	8.37	440.22		8.37	4604		8.36	274.657
	8.38	428.39		8.38	4478		8.37	286.881
	8.39	413.707		8.39	4370		8.38	314.377
	8.4	417.317		8.4	4334		8.39	318.201
	8.41	416.244		8.41	4298		8.4	291.702
	8.42	415.366		8.42	4214		8.41	281.799
	8.43	414		8.43	4082		8.42	285.66
	8.44	394		8.44	3952		8.43	283.994
	8.45	369.22		8.45	3880		8.44	288.091
	8.46	359.171		8.46	3868		8.45	289.368
	8.47	383.902		8.47	3860		8.46	297.714
	8.48	392.927		8.48	3814		8.47	282.809
	8.49	383.659		8.49	3720		8.48	253.69
	8.5	375.268		8.5	3602		8.49	257.678
	8.51	380.488		8.51	3546		8.5	278.334
	8.52	384		8.52	3502		8.51	289.654
	8.53	384.39		8.53	3450		8.52	286.565
	8.54	380		8.54	3474		8.53	278.742
	8.55	367.415		8.55	3514		8.54	269.915
	8.56	361.122		8.56	3486		8.55	258.371
	8.57	351.293		8.57	3462		8.56	273.222
	8.58	360		8.58	3468		8.57	292.742
	8.59	384.854		8.59	3464		8.58	267.295
	8.6	392		8.6	3496		8.59	253.331
	8.61	380		8.61	3586		8.6	258
	8.62	368.146		8.62	3632		8.61	255.191
	8.63	358.878		8.63	3612		8.62	250.158
	8.64	339.024		8.64	3638		8.63	249.015
	8.65	336.39		8.65	3706		8.64	238.523
	8.66	360.732		8.66	3778		8.65	249.55
	8.67	364.024		8.67	3880		8.66	253.471
	8.68	353.512		8.68	3966		8.67	257.295
	8.69	354.024		8.69	4038		8.68	262.681
	8.7	342.683		8.7	4136		8.69	242.869
	8.71	338.268		8.71	4270		8.7	221.733
	8.72	353.268		8.72	4380		8.71	241.769
	8.73	352.585		8.73	4406		8.72	251.805
	8.74	338.732		8.74	4408		8.73	250.614
	8.75	317.951		8.75	4420		8.74	244.505
	8.76	331.902		8.76	4400		8.75	230.383
	8.77	339.22		8.77	4314		8.76	216.602
	8.78	341.415		8.78	4184		8.77	216
	8.79	349.756		8.79	4064		8.78	234.626
	8.8	337.854		8.8	3986		8.79	235.818
	8.81	329.951		8.81	3940		8.8	230.407
	8.82	315.512		8.82	3862		8.81	221.289
	8.83	309.854		8.83	3768		8.82	223.277
	8.84	313.756		8.84	3706		8.83	224.322
	8.85	319.585		8.85	3680		8.84	225.757
	8.86	311.659		8.86	3640		8.85	218.28
	8.87	299.439		8.87	3558		8.86	208.772
	8.88	298.683		8.88	3506		8.87	215.216
	8.89	314.634		8.89	3514		8.88	203.204
	8.9	338.488		8.9	3510		8.89	209.191
	8.91	328.244		8.91	3450		8.9	222
	8.92	304.049		8.92	3352		8.91	219.666
	8.93	299.122		8.93	3242		8.92	233.155
	8.94	299.22		8.94	3144		8.93	231.429
	8.95	305.659		8.95	3058		8.94	214
	8.96	329.122		8.96	3004		8.95	201.763
	8.97	343.39		8.97	3004		8.96	199.787
	8.98	325.073		8.98	3006		8.97	208.529
	8.99	301.317		8.99	2998		8.98	211.672
	9	286.537		9	2966		8.99	200.79
	9.01	284.146		9.01	2946		9	197.769
	9.02	298		9.02	2938		9.01	198.863
	9.03	318.171		9.03	2862		9.02	202
	9.04	341.902		9.04	2772		9.03	213.021
	9.05	341.561		9.05	2756		9.04	206
	9.06	313.707		9.06	2752		9.05	204.997
	9.07	301.756		9.07	2686		9.06	217.97
	9.08	290.146		9.08	2632		9.07	210.863
	9.09	285.024		9.09	2626		9.08	189.921
	9.1	309.171		9.1	2614		9.09	172.948
	9.11	326.439		9.11	2604		9.1	159.489
	9.12	336.537		9.12	2616		9.11	170.468
	9.13	320		9.13	2590		9.12	177.647
	9.14	319.171		9.14	2534		9.13	180.298
	9.15	321.683		9.15	2480		9.14	199.55
	9.16	306.293		9.16	2422		9.15	214.875
	9.17	304		9.17	2370		9.16	194.316
	9.18	299.171		9.18	2370		9.17	182.255
	9.19	282.415		9.19	2406		9.18	179.356
	9.2	285.756		9.2	2432		9.19	192.48
	9.21	308.463		9.21	2426		9.2	189.331
	9.22	308.585		9.22	2384		9.21	178.827
	9.23	298.463		9.23	2338		9.22	180.322
	9.24	283.61		9.24	2316		9.23	189.556
	9.25	262.244		9.25	2312		9.24	203.532
	9.26	246.341		9.26	2316		9.25	196.261
	9.27	255.659		9.27	2334		9.26	180.225
	9.28	277.268		9.28	2336		9.27	170.188
	9.29	266		9.29	2292		9.28	171.587
	9.3	248.049		9.3	2274		9.29	174.821
	9.31	257.415		9.31	2286		9.3	178.079
	9.32	258.341		9.32	2284		9.31	188.681
	9.33	269.244		9.33	2268		9.32	198
	9.34	279.122		9.34	2256		9.33	186.626
	9.35	272.39		9.35	2212		9.34	184.511
	9.36	261.024		9.36	2148		9.35	164.322
	9.37	267.439		9.37	2174		9.36	164.34
	9.38	276.634		9.38	2228		9.37	172.255
	9.39	282.512		9.39	2236		9.38	173.362
	9.4	284		9.4	2200		9.39	163.836
	9.41	261.902		9.41	2176		9.4	170.286
	9.42	252.927		9.42	2164		9.41	193.441
	9.43	250		9.43	2124		9.42	194.188
	9.44	252		9.44	2076		9.43	194.675
	9.45	255.439		9.45	2060		9.44	186.614
	9.46	257.659		9.46	2110		9.45	173.021
	9.47	250.39		9.47	2148		9.46	181.508
	9.48	253.366		9.48	2130		9.47	178.973
	9.49	263.146		9.49	2108		9.48	180.474
	9.5	255.171		9.5	2140		9.49	190
	9.51	237.634		9.51	2192		9.5	188
	9.52	240.244		9.52	2208		9.51	180.875
	9.53	259.024		9.53	2172		9.52	183.277
	9.54	264.195		9.54	2148		9.53	185.24
	9.55	257.415		9.55	2150		9.54	187.599
	9.56	250		9.56	2138		9.55	187.666
	9.57	264.659		9.57	2120		9.56	184.869
	9.58	275.171		9.58	2130		9.57	183.824
	9.59	273.22		9.59	2156		9.58	180.231
	9.6	261.171		9.6	2190		9.59	180.383
	9.61	246		9.61	2222		9.6	179.313
	9.62	251.317		9.62	2226		9.61	186.948
	9.63	255.488		9.63	2232		9.62	192
	9.64	258.976		9.64	2244		9.63	186.292
	9.65	267.39		9.65	2242		9.64	184.839
	9.66	262.195		9.66	2222		9.65	180.267
	9.67	264.488		9.67	2186		9.66	179.021
	9.68	257.171		9.68	2190		9.67	172.973
	9.69	252.366		9.69	2236		9.68	160.231
	9.7	267.659		9.7	2264		9.69	169.781
	9.71	292.634		9.71	2236		9.7	180.967
	9.72	300.293		9.72	2176		9.71	195.416
	9.73	300.927		9.73	2140		9.72	194.182
	9.74	293.268		9.74	2172		9.73	188
	9.75	278.22		9.75	2240		9.74	207.368
	9.76	279.805		9.76	2278		9.75	214.541
	9.77	283.488		9.77	2302		9.76	213.733
	9.78	285.854		9.78	2326		9.77	205.514
	9.79	276.122		9.79	2346		9.78	228.578
	9.8	244.195		9.8	2382		9.79	241.611
	9.81	248		9.81	2420		9.8	209.915
	9.82	275.854		9.82	2400		9.81	194
	9.83	285.927		9.83	2388		9.82	197.939
	9.84	286		9.84	2450		9.83	209.514
				9.85	2502		9.84	223.489
				9.86	2518		9.85	229.757
				9.87	2522		9.86	217.927
				9.88	2532		9.87	224
				9.89	2554
				9.9	2610
				9.91	2678
				9.92	2732
				9.93	2764
