# Supplementary material for: Telomeric double-strand DNA-binding proteins DTN-1 and DTN-2 ensure germline immortality in Caenorhabditis elegans
Source: eLife. 2021 Jan 21;10:e64104. doi: 10.7554/eLife.64104 (PMC7819708; doi:10.7554/eLife.64104)
Supplement: Supplementary file 1. [file elife-64104-supp1.xlsx]

## Sheet: PSMs_per_Sample
Uniprot Accession	Description	Coverage [%]	# Peptides	# PSMs	# Unique Peptides	# PSMs Control IP	# PSMs DTN-1-FLAG-GFP-IP	# PSMs DTN-2-FLAG-GFP-IP	# Peptides Control IP	# Peptides DTN-1-FLAG-GFP-IP	# Peptides DTN-2-FLAG-GFP-IP
G5EBT9	Peptidase_M28 domain-containing protein OS=Caenorhabditis elegans OX=6239 GN=CELE_H27A22.1 PE=1 SV=1	31	9	80	9	42	26	12	9	8	4
P18948	Vitellogenin-6 OS=Caenorhabditis elegans OX=6239 GN=vit-6 PE=1 SV=5	12	18	60	18	38	11	11	17	9	6
O16266	Uncharacterized protein OS=Caenorhabditis elegans OX=6239 GN=CELE_F40A3.6 PE=1 SV=1	31	8	56	8	27	1	28	7	1	8
P42212	Green fluorescent protein OS=Aequorea victoria OX=6100 GN=GFP PE=1 SV=1	37	9	54	9		36	18		9	6
P02566	Myosin-4 OS=Caenorhabditis elegans OX=6239 GN=unc-54 PE=1 SV=2	16	27	54	27	21	17	16	20	17	15
P37165	Ubiquitin-like protein 1-40S ribosomal protein S27a OS=Caenorhabditis elegans OX=6239 GN=ubl-1 PE=1 SV=2	23	2	54	2	16	12	26	2	2	2
H2FLH3	Twitchin OS=Caenorhabditis elegans OX=6239 GN=unc-22 PE=1 SV=1	6	31	50	31	25	10	15	24	10	15
P05690	Vitellogenin-2 OS=Caenorhabditis elegans OX=6239 GN=vit-2 PE=1 SV=5	13	22	48	6	24	19	5	18	13	4
P06125	Vitellogenin-5 OS=Caenorhabditis elegans OX=6239 GN=vit-5 PE=2 SV=2	9	17	47	1	25	12	10	16	8	7
P10984	Actin-2 OS=Caenorhabditis elegans OX=6239 GN=act-2 PE=3 SV=3	34	13	45	6	7	20	18	6	12	10
P91128	60S ribosomal protein L13 OS=Caenorhabditis elegans OX=6239 GN=rpl-13 PE=3 SV=1	45	9	45	9	20	13	12	7	7	8
P18947	Vitellogenin-4 OS=Caenorhabditis elegans OX=6239 GN=vit-4 PE=1 SV=3	8	15	42	1	22	11	9	14	7	6
O45815	ACTin OS=Caenorhabditis elegans OX=6239 GN=act-5 PE=1 SV=1	24	9	42	2	6	18	18	5	8	6
Q9N4J2	Vitellogenin-3 OS=Caenorhabditis elegans OX=6239 GN=vit-3 PE=1 SV=1	9	17	39	2	23	9	7	16	7	6
Q9N3X2	40S ribosomal protein S4 OS=Caenorhabditis elegans OX=6239 GN=rps-4 PE=1 SV=1	37	9	38	9	14	11	13	8	9	7
Q19869	60S ribosomal protein L26 OS=Caenorhabditis elegans OX=6239 GN=rpl-26 PE=3 SV=1	25	5	37	5	14	9	14	5	4	4
P55155	Vitellogenin-1 OS=Caenorhabditis elegans OX=6239 GN=vit-1 PE=1 SV=2	11	18	37	2	19	15	3	15	11	3
P48156	40S ribosomal protein S8 OS=Caenorhabditis elegans OX=6239 GN=rps-8 PE=3 SV=1	51	8	37	8	15	10	12	7	5	6
P53013	Elongation factor 1-alpha OS=Caenorhabditis elegans OX=6239 GN=eft-3 PE=3 SV=1	23	10	36	10	14	7	15	9	7	7
P49181	60S ribosomal protein L36 OS=Caenorhabditis elegans OX=6239 GN=rpl-36 PE=1 SV=3	45	6	36	6	13	10	13	6	4	5
Q19864	WD_REPEATS_REGION domain-containing protein OS=Caenorhabditis elegans OX=6239 GN=cpf-1 PE=1 SV=1	42	14	33	14	17	11	5	13	9	4
O45946	60S ribosomal protein L18 OS=Caenorhabditis elegans OX=6239 GN=rpl-18 PE=3 SV=1	28	6	31	6	9	10	12	6	6	4
Q27894	Histone H2B 2 OS=Caenorhabditis elegans OX=6239 GN=his-4 PE=1 SV=3	34	4	29	4	7	9	13	3	4	4
P42001	Protection of telomeres homolog 1 OS=Caenorhabditis elegans OX=6239 GN=pot-1 PE=2 SV=3	13	7	29	7		17	12		7	4
Q966C6	60S ribosomal protein L7a OS=Caenorhabditis elegans OX=6239 GN=rpl-7A PE=1 SV=3	39	11	28	11	10	9	9	9	8	7
Q22716	Ribosomal Protein, Large subunit OS=Caenorhabditis elegans OX=6239 GN=rpl-32 PE=1 SV=1	36	5	27	5	12	11	4	5	5	4
Q21930	60S ribosomal protein L28 OS=Caenorhabditis elegans OX=6239 GN=rpl-28 PE=1 SV=3	48	7	26	7	11	7	8	7	5	5
O18240	Ribosomal Protein, Small subunit OS=Caenorhabditis elegans OX=6239 GN=rps-18 PE=1 SV=1	46	6	26	6	13	8	5	5	6	4
Q9XVF7	60S ribosomal protein L8 OS=Caenorhabditis elegans OX=6239 GN=rpl-2 PE=3 SV=1	28	9	25	9	9	7	9	9	7	7
Q9N5S7	ThioredoXin Domain Containing protein homolog OS=Caenorhabditis elegans OX=6239 GN=txdc-12.2 PE=1 SV=1	33	6	25	6	10	7	8	6	3	2
Q22429	Uncharacterized protein OS=Caenorhabditis elegans OX=6239 GN=CELE_T12E12.3 PE=1 SV=1	19	12	25	8		4	21		2	10
O18650	40S ribosomal protein S19 OS=Caenorhabditis elegans OX=6239 GN=rps-19 PE=2 SV=1	42	7	24	7	8	10	6	6	7	4
P62784	Histone H4 OS=Caenorhabditis elegans OX=6239 GN=his-1 PE=1 SV=2	42	5	23	5	9	8	6	5	3	2
Q9NEN6	40S ribosomal protein S6 OS=Caenorhabditis elegans OX=6239 GN=rps-6 PE=1 SV=1	21	5	22	5	9	7	6	5	4	5
Q20206	Ribosomal_S17_N domain-containing protein OS=Caenorhabditis elegans OX=6239 GN=rps-11 PE=1 SV=1	26	5	20	5	6	8	6	4	5	4
O01868	60S ribosomal protein L24 OS=Caenorhabditis elegans OX=6239 GN=rpl-24.1 PE=3 SV=1	36	7	19	7	8	7	4	5	6	4
P48154	40S ribosomal protein S3a OS=Caenorhabditis elegans OX=6239 GN=rps-1 PE=3 SV=2	37	9	18	9	9	5	4	8	5	4
P47991	60S ribosomal protein L6 OS=Caenorhabditis elegans OX=6239 GN=rpl-6 PE=1 SV=1	29	6	18	6	6	9	3	4	6	3
A3QMC5	Ribosomal Protein, Large subunit OS=Caenorhabditis elegans OX=6239 GN=rpl-34 PE=1 SV=1	34	5	17	5	6	6	5	5	5	4
O44480	60S ribosomal protein L18a OS=Caenorhabditis elegans OX=6239 GN=rpl-20 PE=3 SV=2	27	4	17	4	4	8	5	4	3	2
O02056	60S ribosomal protein L4 OS=Caenorhabditis elegans OX=6239 GN=rpl-4 PE=1 SV=3	27	8	16	8	7	6	3	6	5	3
O02639	60S ribosomal protein L19 OS=Caenorhabditis elegans OX=6239 GN=rpl-19 PE=3 SV=1	18	3	16	3	5	4	7	3	3	3
P49180	60S ribosomal protein L35a OS=Caenorhabditis elegans OX=6239 GN=rpl-33 PE=1 SV=3	44	6	16	6	4	9	3	3	5	3
Q93637	Uncharacterized protein OS=Caenorhabditis elegans OX=6239 GN=hpo-34 PE=1 SV=3	7	5	16	5	5	2	9	4	1	3
G5ED07	Protein disulfide-isomerase OS=Caenorhabditis elegans OX=6239 GN=pdi-3 PE=1 SV=1	15	7	15	7	9	5	1	7	4	1
O01802	60S ribosomal protein L7 OS=Caenorhabditis elegans OX=6239 GN=rpl-7 PE=3 SV=1	33	9	15	9	9	3	3	8	3	3
Q95Y04	40S ribosomal protein S28 OS=Caenorhabditis elegans OX=6239 GN=rps-28 PE=3 SV=1	51	3	14	3	5	4	5	3	3	3
O62329	Uncharacterized protein OS=Caenorhabditis elegans OX=6239 GN=CELE_R06A4.2 PE=1 SV=1	13	11	14	7		12	2		9	2
P52819	60S ribosomal protein L22 OS=Caenorhabditis elegans OX=6239 GN=rpl-22 PE=1 SV=3	32	4	13	4	3	6	4	3	4	3
Q565D1	Uncharacterized protein OS=Caenorhabditis elegans OX=6239 GN=CELE_F49E2.5 PE=1 SV=1	10	9	13	9	10		3	9		3
Q21614	Alpha-carbonic anhydrase domain-containing protein OS=Caenorhabditis elegans OX=6239 GN=cah-4 PE=1 SV=3	23	6	13	6	10	2	1	6	2	1
O45499	40S ribosomal protein S26 OS=Caenorhabditis elegans OX=6239 GN=rps-26 PE=3 SV=1	26	3	12	3	5	3	4	3	2	2
O62388	Ribosomal protein L37 OS=Caenorhabditis elegans OX=6239 GN=CELE_W01D2.1 PE=1 SV=1	28	3	12	3	3	3	6	3	3	1
P48166	Ribosomal protein rpl-36.A OS=Caenorhabditis elegans OX=6239 GN=rpl-36.A PE=3 SV=2	19	2	12	2	5	2	5	2	2	2
O01869	S10_plectin domain-containing protein OS=Caenorhabditis elegans OX=6239 GN=rps-10 PE=1 SV=1	29	3	12	3	4	4	4	3	3	2
P52821	40S ribosomal protein S25 OS=Caenorhabditis elegans OX=6239 GN=rps-25 PE=3 SV=1	22	3	11	3	3	4	4	3	3	1
G5EEC0	60S ribosomal protein L3 OS=Caenorhabditis elegans OX=6239 GN=rpl-3 PE=1 SV=1	21	8	11	8	6	3	2	6	2	2
Q17770	Protein disulfide-isomerase 2 OS=Caenorhabditis elegans OX=6239 GN=pdi-2 PE=1 SV=1	18	8	11	8	9	2		8	2
Q966I7	CCHC-type domain-containing protein OS=Caenorhabditis elegans OX=6239 GN=CELE_K08D12.3 PE=1 SV=1	40	6	11	6	6		5	6		5
P34334	60S ribosomal protein L21 OS=Caenorhabditis elegans OX=6239 GN=rpl-21 PE=3 SV=3	34	5	11	5	5	4	2	5	4	2
Q22054	40S ribosomal protein S16 OS=Caenorhabditis elegans OX=6239 GN=rps-16 PE=1 SV=3	36	5	11	5	4	4	3	4	3	2
O17570	60S ribosomal protein L38 OS=Caenorhabditis elegans OX=6239 GN=rpl-38 PE=3 SV=2	29	3	11	3	3	3	5	2	2	1
P91914	60S ribosomal protein L27 OS=Caenorhabditis elegans OX=6239 GN=rpl-27 PE=2 SV=1	29	5	10	5	4	3	3	3	2	3
Q9XVE9	Ribosomal_L14e domain-containing protein OS=Caenorhabditis elegans OX=6239 GN=rpl-14 PE=1 SV=1	18	2	10	2	3	3	4	2	2	2
P51404	40S ribosomal protein S13 OS=Caenorhabditis elegans OX=6239 GN=rps-13 PE=3 SV=2	18	2	10	2	3	3	4	2	2	1
P09446	Heat shock 70 kDa protein A OS=Caenorhabditis elegans OX=6239 GN=hsp-1 PE=1 SV=2	11	6	10	3	5	3	2	5	3	2
Q18529	Uncharacterized protein OS=Caenorhabditis elegans OX=6239 GN=C39D10.7 PE=1 SV=3	5	5	9	5	4	3	2	4	3	2
Q18688	Heat shock protein 90 OS=Caenorhabditis elegans OX=6239 GN=daf-21 PE=1 SV=1	9	5	9	5	4	3	2	4	3	2
P48150	40S ribosomal protein S14 OS=Caenorhabditis elegans OX=6239 GN=rps-14 PE=3 SV=1	30	3	9	3	4	3	2	3	3	2
P19625	Myosin regulatory light chain 1 OS=Caenorhabditis elegans OX=6239 GN=mlc-1 PE=4 SV=1	21	3	9	3	4	3	2	3	2	2
P48152	40S ribosomal protein S3 OS=Caenorhabditis elegans OX=6239 GN=rps-3 PE=3 SV=1	18	5	9	5	5	2	2	5	2	2
Q20228	40S ribosomal protein S9 OS=Caenorhabditis elegans OX=6239 GN=rps-9 PE=3 SV=1	23	5	9	5	4	4	1	4	4	1
Q9BKU6	Ribosomal_L18e/L15P domain-containing protein OS=Caenorhabditis elegans OX=6239 GN=CELE_Y37E3.8 PE=1 SV=1	47	4	9	4	3	4	2	3	4	2
Q9BL19	60S ribosomal protein L17 OS=Caenorhabditis elegans OX=6239 GN=rpl-17 PE=3 SV=1	19	4	9	4	6	2	1	4	2	1
P49632	Ubiquitin-60S ribosomal protein L40 OS=Caenorhabditis elegans OX=6239 GN=ubq-2 PE=3 SV=2	23	3	9	3	2	4	3	2	3	3
H2KYR1	HABP4_PAI-RBP1 domain-containing protein OS=Caenorhabditis elegans OX=6239 GN=vig-1 PE=1 SV=1	17	5	8	5	5		3	5		3
Q18231	40S ribosomal protein S30 OS=Caenorhabditis elegans OX=6239 GN=rps-30 PE=1 SV=1	8	2	8	2	3	3	2	2	2	2
Q11067	Protein disulfide-isomerase A6 homolog OS=Caenorhabditis elegans OX=6239 GN=pdi-6 PE=3 SV=1	19	5	8	5	5	3		5	2
Q9UB28	Myotactin form B OS=Caenorhabditis elegans OX=6239 GN=let-805 PE=1 SV=1	1	3	7	3	4	1	2	3	1	2
P27420	Heat shock 70 kDa protein C OS=Caenorhabditis elegans OX=6239 GN=hsp-3 PE=1 SV=2	6	4	7	1	3	2	2	3	2	2
P34662	60S ribosomal protein L35 OS=Caenorhabditis elegans OX=6239 GN=rpl-35 PE=3 SV=1	24	3	7	3	4	2	1	3	2	1
Q8WQA8	Ribosomal_S10 domain-containing protein OS=Caenorhabditis elegans OX=6239 GN=rps-20 PE=1 SV=1	29	3	7	3	4	2	1	3	2	1
P29691	Elongation factor 2 OS=Caenorhabditis elegans OX=6239 GN=eef-2 PE=1 SV=4	4	4	7	4	4	2	1	4	2	1
Q09610	Probable galaptin lec-8 OS=Caenorhabditis elegans OX=6239 GN=lec-8 PE=2 SV=2	20	3	6	3	4	2		3	2
Q10454	Probable arginine kinase F46H5.3 OS=Caenorhabditis elegans OX=6239 GN=F46H5.3 PE=3 SV=2	12	4	6	4	4	2		4	2
Q95Y46	Ribosomal protein OS=Caenorhabditis elegans OX=6239 GN=rpl-1 PE=1 SV=1	23	3	6	3	3	2	1	3	2	1
P10567	Paramyosin OS=Caenorhabditis elegans OX=6239 GN=unc-15 PE=1 SV=2	4	3	6	3	3	3		3	3
Q1XFY9	Ribosomal Protein, Small subunit OS=Caenorhabditis elegans OX=6239 GN=rps-24 PE=1 SV=1	11	1	6	1	2	2	2	1	1	1
Q20647	60S ribosomal protein L23a 2 OS=Caenorhabditis elegans OX=6239 GN=rpl-25.2 PE=3 SV=1	23	3	6	2	2	1	3	2	1	2
Q09533	60S ribosomal protein L10 OS=Caenorhabditis elegans OX=6239 GN=rpl-10 PE=3 SV=1	18	4	6	4	3	3		3	3
Q20007	Uncharacterized protein OS=Caenorhabditis elegans OX=6239 GN=CELE_F35A5.1 PE=1 SV=4	6	4	5	4	4		1	4		1
Q9NA78	Thioredoxin domain-containing protein OS=Caenorhabditis elegans OX=6239 GN=txdc-12.1 PE=1 SV=1	11	3	5	3	2	3		2	3
O44145	PERMeable eggshell OS=Caenorhabditis elegans OX=6239 GN=perm-2 PE=1 SV=2	5	2	5	2	3		2	2		2
O01692	40S ribosomal protein S17 OS=Caenorhabditis elegans OX=6239 GN=rps-17 PE=3 SV=2	20	2	5	2	3	1	1	2	1	1
Q9U2A8	60S ribosomal protein L37a OS=Caenorhabditis elegans OX=6239 GN=rpl-43 PE=3 SV=3	30	2	5	2	3	2		2	1
Q19877	40S ribosomal protein S23 OS=Caenorhabditis elegans OX=6239 GN=rps-23 PE=3 SV=1	24	3	5	3	1	2	2	1	2	2
Q18885	Transcription factor BTF3 homolog OS=Caenorhabditis elegans OX=6239 GN=icd-1 PE=1 SV=1	27	2	5	2	1	3	1	1	2	1
P12456	Tubulin beta-1 chain OS=Caenorhabditis elegans OX=6239 GN=mec-7 PE=2 SV=1	8	3	5	1		3	2		3	2
Q23050	CaLponIn-liKe proteins OS=Caenorhabditis elegans OX=6239 GN=clik-1 PE=1 SV=1	12	4	5	4	1	1	3	1	1	3
P52275	Tubulin beta-2 chain OS=Caenorhabditis elegans OX=6239 GN=tbb-2 PE=1 SV=1	8	3	5	1	1	3	1	1	3	1
Q18066	Disorganized muscle protein 1 OS=Caenorhabditis elegans OX=6239 GN=dim-1 PE=1 SV=3	9	4	5	4	4		1	4		1
P51403	40S ribosomal protein S2 OS=Caenorhabditis elegans OX=6239 GN=rps-2 PE=3 SV=1	14	4	5	4	3		2	3		2
P43510	Cathepsin B-like cysteine proteinase 6 OS=Caenorhabditis elegans OX=6239 GN=cpr-6 PE=1 SV=1	8	2	5	2	1	3	1	1	2	1
Q9XXK1	ATP synthase subunit alpha, mitochondrial OS=Caenorhabditis elegans OX=6239 GN=atp-1 PE=1 SV=1	5	3	5	3	1	3	1	1	3	1
Q20363	Stress-induced protein 1 OS=Caenorhabditis elegans OX=6239 GN=sip-1 PE=1 SV=1	21	2	5	2	1	4		1	1
P37806	Protein unc-87 OS=Caenorhabditis elegans OX=6239 GN=unc-87 PE=1 SV=3	4	2	4	2	1	1	2	1	1	2
Q17832	ViGiLN homolog OS=Caenorhabditis elegans OX=6239 GN=vgln-1 PE=1 SV=2	2	3	4	3	3		1	3		1
P46561	ATP synthase subunit beta, mitochondrial OS=Caenorhabditis elegans OX=6239 GN=atp-2 PE=1 SV=2	6	2	4	2		2	2		2	2
H2L044	Prion-like-(Q/N-rich)-domain-bearing protein OS=Caenorhabditis elegans OX=6239 GN=pqn-52 PE=1 SV=1	10	2	4	2	2	1	1	2	1	1
G5EC04	Calcium-transporting ATPase OS=Caenorhabditis elegans OX=6239 GN=mca-1 PE=1 SV=1	1	2	4	2	2		2	2		2
Q4W5P0	Homologous to Drosophila SQD (Squid) protein OS=Caenorhabditis elegans OX=6239 GN=sqd-1 PE=1 SV=1	5	1	4	1	2		2	1		1
A0A2I2LDV7	Titin homolog OS=Caenorhabditis elegans OX=6239 GN=ttn-1 PE=1 SV=1	4	4	4	4	4			4
Q17967	Protein disulfide-isomerase 1 OS=Caenorhabditis elegans OX=6239 GN=pdi-1 PE=3 SV=1	8	3	4	3	3		1	2		1
Q9XWC3	DOMON domain-containing protein Y73F4A.2 OS=Caenorhabditis elegans OX=6239 GN=Y73F4A.2 PE=1 SV=1	29	2	4	2	1	2	1	1	2	1
Q27485	Histone H2A OS=Caenorhabditis elegans OX=6239 GN=his-35 PE=3 SV=1	13	2	4	2	2	1	1	2	1	1
A0A2C9C3A7	Nuclear anchorage protein 1 OS=Caenorhabditis elegans OX=6239 GN=anc-1 PE=1 SV=1	2	4	4	4	4			4
Q23258	Uncharacterized protein OS=Caenorhabditis elegans OX=6239 GN=CELE_ZC373.2 PE=1 SV=2	43	3	4	3	3	1		3	1
P49405	60S ribosomal protein L5 OS=Caenorhabditis elegans OX=6239 GN=rpl-5 PE=3 SV=1	15	3	3	3	3			3
H2L0I4	Lin-5 (Five) Interacting protein OS=Caenorhabditis elegans OX=6239 GN=lfi-1 PE=1 SV=2	2	3	3	3	3			3
P48162	60S ribosomal protein L23a 1 OS=Caenorhabditis elegans OX=6239 GN=rpl-25.1 PE=3 SV=1	16	2	3	1	1		2	1		2
Q95Y90	60S ribosomal protein L9 OS=Caenorhabditis elegans OX=6239 GN=rpl-9 PE=3 SV=1	15	2	3	2	2	1		2	1
G5EC10	Galectin OS=Caenorhabditis elegans OX=6239 GN=lec-9 PE=1 SV=1	19	2	3	2	2		1	2		1
A0A5E4M2N5	Uncharacterized protein OS=Caenorhabditis elegans OX=6239 GN=CELE_T23E7.2 PE=1 SV=1	6	3	3	3	3			3
Q9U332	60S ribosomal protein L31 OS=Caenorhabditis elegans OX=6239 GN=rpl-31 PE=3 SV=1	13	2	3	2	1	1	1	1	1	1
Q9N4F2	Mediator of RNA polymerase II transcription subunit 19 OS=Caenorhabditis elegans OX=6239 GN=mdt-19 PE=3 SV=1	5	1	3	1	1	2		1	1
O45097	Uncharacterized protein OS=Caenorhabditis elegans OX=6239 GN=CELE_F57H12.6 PE=1 SV=2	8	2	3	2	2	1		2	1
Q9XWT3	Uterine Lumin Expressed/locailized OS=Caenorhabditis elegans OX=6239 GN=ule-5 PE=1 SV=1	7	1	3	1	1	1	1	1	1	1
O17406	AT hook Transcription Factor family OS=Caenorhabditis elegans OX=6239 GN=attf-2 PE=1 SV=1	8	3	3	3	3			3
G5EBF3	Protein Up-regulated in Daf-2(Gf) OS=Caenorhabditis elegans OX=6239 GN=pud-2.1 PE=1 SV=1	14	2	3	2	2		1	2		1
Q9XWU9	Uncharacterized protein OS=Caenorhabditis elegans OX=6239 GN=CELE_Y37D8A.19 PE=1 SV=1	11	1	3	1	1	1	1	1	1	1
P34339	Eukaryotic translation initiation factor 3 subunit A OS=Caenorhabditis elegans OX=6239 GN=egl-45 PE=3 SV=1	2	2	3	2	1		2	1		2
Q9NEW6	Probable splicing factor, arginine/serine-rich 3 OS=Caenorhabditis elegans OX=6239 GN=rsp-3 PE=1 SV=2	4	1	3	1	1	1	1	1	1	1
B7FAR9	Uncharacterized protein OS=Caenorhabditis elegans OX=6239 GN=CELE_Y43F8B.1 PE=1 SV=1	5	2	3	2	2		1	2		1
Q9XVR8	Putative H/ACA ribonucleoprotein complex subunit 3 OS=Caenorhabditis elegans OX=6239 GN=nola-3 PE=3 SV=2	36	2	3	2	2		1	2		1
A0A5S9MRZ2	Uncharacterized protein OS=Caenorhabditis elegans OX=6239 GN=CELE_F54H12.10 PE=4 SV=1	17	1	3	1	1	1	1	1	1	1
Q21531	MIF4G domain-containing protein OS=Caenorhabditis elegans OX=6239 GN=ifg-1 PE=1 SV=1	2	1	2	1	1		1	1		1
Q966L9	ATP-dependent RNA helicase glh-2 OS=Caenorhabditis elegans OX=6239 GN=glh-2 PE=1 SV=1	2	1	2	1	1		1	1		1
Q9NEY7	Uncharacterized protein OS=Caenorhabditis elegans OX=6239 GN=CELE_Y105E8A.11 PE=1 SV=1	10	1	2	1	1	1		1	1
O17861	GILT-like protein F37H8.5 OS=Caenorhabditis elegans OX=6239 GN=F37H8.5 PE=1 SV=1	6	2	2	2	1	1		1	1
O76840	Papilin OS=Caenorhabditis elegans OX=6239 GN=mig-6 PE=1 SV=1	0	1	2	1	1	1		1	1
Q9GRZ9	Transmembrane and Coiled-Coil protein OS=Caenorhabditis elegans OX=6239 GN=tcc-1 PE=1 SV=1	2	1	2	1	1		1	1		1
Q20476	BTB domain-containing protein OS=Caenorhabditis elegans OX=6239 GN=CELE_F46G10.1 PE=1 SV=3	12	2	2	2	2			2
O17694	RNAi-Induced Longevity OS=Caenorhabditis elegans OX=6239 GN=ril-1 PE=1 SV=1	6	1	2	1	1		1	1		1
Q94162	TIL domain-containing protein OS=Caenorhabditis elegans OX=6239 GN=C10G8.4 PE=1 SV=1	8	1	2	1	1	1		1	1
P02567	Myosin-1 OS=Caenorhabditis elegans OX=6239 GN=myo-1 PE=1 SV=3	1	2	2	2	2			2
D0PV95	ATP-dependent RNA helicase laf-1 OS=Caenorhabditis elegans OX=6239 GN=laf-1 PE=1 SV=1	3	2	2	2			2			2
P27604	Adenosylhomocysteinase OS=Caenorhabditis elegans OX=6239 GN=ahcy-1 PE=3 SV=1	5	2	2	2	2			2
Q95XT1	SUPpressor of Rpm-1 OS=Caenorhabditis elegans OX=6239 GN=supr-1 PE=4 SV=1	1	1	2	1		2			1
G5EEV5	5C820 OS=Caenorhabditis elegans OX=6239 GN=pud-3 PE=1 SV=1	6	1	2	1	2			1
Q19162	60S ribosomal protein L11-2 OS=Caenorhabditis elegans OX=6239 GN=rpl-11.2 PE=3 SV=1	7	1	2	1		1	1		1	1
P34329	Probable protein disulfide-isomerase A4 OS=Caenorhabditis elegans OX=6239 GN=C14B9.2 PE=3 SV=2	1	1	2	1	1		1	1		1
O76743	ATP-dependent RNA helicase glh-4 OS=Caenorhabditis elegans OX=6239 GN=glh-4 PE=1 SV=2	2	1	2	1	1		1	1		1
Q18318	RRM domain-containing protein OS=Caenorhabditis elegans OX=6239 GN=rbmx-2 PE=1 SV=1	4	1	2	1	1		1	1		1
A0A486WWC6	Uncharacterized protein OS=Caenorhabditis elegans OX=6239 GN=CELE_Y37E3.17 PE=1 SV=1	2	2	2	2	1	1		1	1
P10299	Glutathione S-transferase P OS=Caenorhabditis elegans OX=6239 GN=gst-1 PE=1 SV=1	10	2	2	2	2			2
P91253	Probable glutathione S-transferase 7 OS=Caenorhabditis elegans OX=6239 GN=gst-7 PE=3 SV=1	11	2	2	2	2			2
Q9XWT5	Uncharacterized protein OS=Caenorhabditis elegans OX=6239 GN=CELE_Y62H9A.3 PE=1 SV=1	7	2	2	2	1	1		1	1
G5EE42	N-acetyltransferase domain-containing protein OS=Caenorhabditis elegans OX=6239 GN=CELE_ZK1098.11 PE=1 SV=1	28	2	2	2	2			2
Q93572	60S acidic ribosomal protein P0 OS=Caenorhabditis elegans OX=6239 GN=rla-0 PE=1 SV=3	10	2	2	2		1	1		1	1
Q27504	Putative carbonic anhydrase 3 OS=Caenorhabditis elegans OX=6239 GN=cah-3 PE=3 SV=1	7	1	2	1	1	1		1	1
Q5ZET1	Kappa casein (Fragment) OS=Bos taurus GN=csn3 PE=4 SV=1	8	1	2	1	2			1
Q9TXP0	40S ribosomal protein S27 OS=Caenorhabditis elegans OX=6239 GN=rps-27 PE=1 SV=3	16	1	2	1	1	1		1	1
P17330	Glyceraldehyde-3-phosphate dehydrogenase 3 OS=Caenorhabditis elegans OX=6239 GN=gpd-3 PE=3 SV=1	2	1	2	1		1	1		1	1
Q19698	Invertebrate LYSozyme OS=Caenorhabditis elegans OX=6239 GN=ilys-5 PE=1 SV=1	17	2	2	2	2			2
O45552	ACetyl-CoA Acyltransferase 2 homolog OS=Caenorhabditis elegans OX=6239 GN=acaa-2 PE=1 SV=2	2	1	1	1	1			1
Q9NAH4	Density-regulated protein homolog OS=Caenorhabditis elegans OX=6239 GN=Y47D3A.21 PE=3 SV=1	7	1	1	1	1			1
H9G353	Basement membrane proteoglycan OS=Caenorhabditis elegans OX=6239 GN=unc-52 PE=1 SV=1	0	1	1	1	1			1
O01530	Aspartic protease 6 OS=Caenorhabditis elegans OX=6239 GN=asp-6 PE=1 SV=1	4	1	1	1	1			1
Q27389	60S ribosomal protein L13a OS=Caenorhabditis elegans OX=6239 GN=rpl-16 PE=2 SV=1	4	1	1	1	1			1
Q95ZV0	Dauer Up-Regulated OS=Caenorhabditis elegans OX=6239 GN=dur-1 PE=1 SV=3	3	1	1	1	1			1
A0A2C9C365	Muscle M-line assembly protein unc-89 OS=Caenorhabditis elegans OX=6239 GN=unc-89 PE=1 SV=1	0	1	1	1			1			1
O17684	Uncharacterized protein OS=Caenorhabditis elegans OX=6239 GN=C49F5.6 PE=4 SV=1	1	1	1	1		1			1
H2KY56	PWWP domain-containing protein OS=Caenorhabditis elegans OX=6239 GN=C06A5.3 PE=1 SV=1	1	1	1	1		1			1
P34383	Fatty-acid and retinol-binding protein 2 OS=Caenorhabditis elegans OX=6239 GN=far-2 PE=3 SV=1	4	1	1	1	1			1
P08898	Histone H3 OS=Caenorhabditis elegans OX=6239 GN=his-2 PE=1 SV=4	5	1	1	1		1			1
Q22935	Uncharacterized protein OS=Caenorhabditis elegans OX=6239 GN=C50E3.12 PE=1 SV=1	2	1	1	1	1			1
H2KZL7	Thioredoxin domain-containing protein OS=Caenorhabditis elegans OX=6239 GN=prdx-2 PE=1 SV=1	4	1	1	1	1			1
G5EBV4	Galectin OS=Caenorhabditis elegans OX=6239 GN=lec-10 PE=1 SV=1	6	1	1	1	1			1
O45075	PHD-type domain-containing protein OS=Caenorhabditis elegans OX=6239 GN=CELE_F53H1.4 PE=1 SV=3	1	1	1	1			1			1
Q17698	DUF148 domain-containing protein OS=Caenorhabditis elegans OX=6239 GN=nlp-77 PE=1 SV=1	15	1	1	1	1			1
E2JL06	YchF-GTPase_C domain-containing protein OS=Caenorhabditis elegans OX=6239 GN=ola-1 PE=1 SV=1	8	1	1	1	1			1
Q9GP96	LIM zinc-binding domain-containing protein OS=Caenorhabditis elegans OX=6239 GN=mlp-1 PE=1 SV=3	13	1	1	1	1			1
P48158	60S ribosomal protein L23 OS=Caenorhabditis elegans OX=6239 GN=rpl-23 PE=3 SV=1	6	1	1	1		1			1
Q4TT88	Puromycin-sensitive aminopeptidase OS=Caenorhabditis elegans OX=6239 GN=pam-1 PE=1 SV=1	1	1	1	1	1			1
U4PCD4	Phosphorylase b kinase regulatory subunit OS=Caenorhabditis elegans OX=6239 GN=CELE_Y67D8A.2 PE=1 SV=1	3	1	1	1	1			1
Q09347	Uncharacterized protein T05H10.3 OS=Caenorhabditis elegans OX=6239 GN=T05H10.3 PE=1 SV=1	6	1	1	1	1			1
O45595	Protection of telomeres homolog 2 OS=Caenorhabditis elegans OX=6239 GN=pot-2 PE=3 SV=1	7	1	1	1		1			1
Q9N3D9	NADH Ubiquinone oxidoreductase Fe-S protein OS=Caenorhabditis elegans OX=6239 GN=nduf-5 PE=1 SV=1	8	1	1	1	1			1
G5EEK3	Non-centrosomal microtubule array protein 1 OS=Caenorhabditis elegans OX=6239 GN=noca-1 PE=2 SV=1	1	1	1	1		1			1
P91415	Uncharacterized protein OS=Caenorhabditis elegans OX=6239 GN=CELE_T01D1.3 PE=1 SV=1	5	1	1	1	1			1
Q09599	Histone RNA hairpin-binding protein OS=Caenorhabditis elegans OX=6239 GN=cdl-1 PE=2 SV=1	4	1	1	1		1			1
O45865	Adenine Nucleotide Translocator OS=Caenorhabditis elegans OX=6239 GN=ant-1.1 PE=1 SV=1	3	1	1	1		1			1
H2L2E5	GRound-Like (Grd related) OS=Caenorhabditis elegans OX=6239 GN=grl-23 PE=1 SV=2	3	1	1	1		1			1
Q93573	Translationally-controlled tumor protein homolog OS=Caenorhabditis elegans OX=6239 GN=tct-1 PE=1 SV=1	9	1	1	1	1			1
E3W737	Protein kinase domain-containing protein OS=Caenorhabditis elegans OX=6239 GN=prpf-4 PE=1 SV=1	2	1	1	1		1			1
G5EEL9	HMG OS=Caenorhabditis elegans OX=6239 GN=hmg-11 PE=1 SV=1	9	1	1	1			1			1
Q9N4I3	Uncharacterized protein OS=Caenorhabditis elegans OX=6239 GN=CELE_Y71F9AL.9 PE=1 SV=1	5	1	1	1	1			1
Q22540	Uncharacterized protein OS=Caenorhabditis elegans OX=6239 GN=CELE_T18D3.1 PE=1 SV=1	4	1	1	1	1			1
U4PC51	Transket_pyr domain-containing protein OS=Caenorhabditis elegans OX=6239 GN=ogdh-1 PE=1 SV=1	1	1	1	1	1			1
P34462	V-type proton ATPase subunit D OS=Caenorhabditis elegans OX=6239 GN=vha-14 PE=3 SV=1	3	1	1	1		1			1
Q18599	AcetylCoA_hyd_C domain-containing protein OS=Caenorhabditis elegans OX=6239 GN=acer-1 PE=1 SV=3	3	1	1	1			1			1
P17140	Collagen alpha-2(IV) chain OS=Caenorhabditis elegans OX=6239 GN=let-2 PE=1 SV=2	1	1	1	1			1			1
Q7JKI3	Phosphoenolypyruvate CarboxyKinase OS=Caenorhabditis elegans OX=6239 GN=pck-2 PE=1 SV=1	2	1	1	1	1			1
Q9XVP0	40S ribosomal protein S15 OS=Caenorhabditis elegans OX=6239 GN=rps-15 PE=1 SV=3	8	1	1	1			1			1
O01159	Probable splicing factor, arginine/serine-rich 7 OS=Caenorhabditis elegans OX=6239 GN=rsp-7 PE=3 SV=3	3	1	1	1	1			1
V6CLG8	Chaperonin homolog Hsp-60, mitochondrial OS=Caenorhabditis elegans OX=6239 GN=hsp-60 PE=1 SV=1	6	1	1	1	1			1
V6CJB8	KETtiN (Drosophila actin-binding) homolog OS=Caenorhabditis elegans OX=6239 GN=ketn-1 PE=1 SV=1	0	1	1	1			1			1
Q21351	Ras-Gtpase-activating protein SH3 (Three) domain-Binding Protein OS=Caenorhabditis elegans OX=6239 GN=gtbp-1 PE=1 SV=2	3	1	1	1	1			1
P34689	ATP-dependent RNA helicase glh-1 OS=Caenorhabditis elegans OX=6239 GN=glh-1 PE=1 SV=3	1	1	1	1	1			1
P12845	Myosin-2 OS=Caenorhabditis elegans OX=6239 GN=myo-2 PE=1 SV=2	1	1	1	1	1			1
P91910	Tubulin alpha-3 chain OS=Caenorhabditis elegans OX=6239 GN=mec-12 PE=1 SV=1	4	1	1	1	1			1
G5EFM7	Uncharacterized protein OS=Caenorhabditis elegans OX=6239 GN=CELE_F18C12.3 PE=1 SV=1	2	1	1	1	1			1
Q8MXJ3	MATH (Meprin-associated Traf homology) domain containing OS=Caenorhabditis elegans OX=6239 GN=math-3 PE=4 SV=1	3	1	1	1	1			1
Q65XX4	Uncharacterized protein OS=Caenorhabditis elegans OX=6239 GN=CELE_Y47G6A.15 PE=1 SV=1	4	1	1	1	1			1
Q23621	Glutamate dehydrogenase OS=Caenorhabditis elegans OX=6239 GN=gdh-1 PE=1 SV=1	2	1	1	1	1			1
P12844	Myosin-3 OS=Caenorhabditis elegans OX=6239 GN=myo-3 PE=2 SV=1	1	1	1	1	1			1
O16259	Stress-induced-phosphoprotein 1 OS=Caenorhabditis elegans OX=6239 GN=sti-1 PE=1 SV=1	4	1	1	1	1			1
O17725	DUF19 domain-containing protein OS=Caenorhabditis elegans OX=6239 GN=CELE_D1086.3 PE=1 SV=1	7	1	1	1	1			1
Q21276	Nucleolar protein 56 OS=Caenorhabditis elegans OX=6239 GN=nol-56 PE=3 SV=1	5	1	1	1		1			1
P90889	Uncharacterized protein OS=Caenorhabditis elegans OX=6239 GN=CELE_F55H12.4 PE=1 SV=1	6	1	1	1	1			1
Q18577	DUF148 domain-containing protein OS=Caenorhabditis elegans OX=6239 GN=C42D4.1 PE=1 SV=1	4	1	1	1	1			1
G5EBP0	Uncharacterized protein OS=Caenorhabditis elegans OX=6239 GN=CELE_K08C7.6 PE=1 SV=1	2	1	1	1	1			1
Q94230	Pur alpha Like Protein OS=Caenorhabditis elegans OX=6239 GN=plp-1 PE=1 SV=1	6	1	1	1	1			1
P61866	60S ribosomal protein L12 OS=Caenorhabditis elegans OX=6239 GN=rpl-12 PE=3 SV=1	9	1	1	1	1			1
P52814	60S ribosomal protein L39 OS=Caenorhabditis elegans OX=6239 GN=rpl-39 PE=3 SV=1	20	1	1	1	1			1
O45226	60S ribosomal protein L29 OS=Caenorhabditis elegans OX=6239 GN=rpl-29 PE=1 SV=1	11	1	1	1	1			1
Q23315	Glutamyl(E) Amino-acyl tRNA Synthetase OS=Caenorhabditis elegans OX=6239 GN=ears-1 PE=1 SV=1	3	1	1	1			1			1
O45819	GlYcoGenin like OS=Caenorhabditis elegans OX=6239 GN=gyg-2 PE=1 SV=1	5	1	1	1	1			1
W6EKY2	14-3-3 zeta OS=Caenorhabditis elegans OX=6239 GN=ftt-2 PE=1 SV=1	3	1	1	1		1			1
Q20970	Methionine--tRNA ligase, cytoplasmic OS=Caenorhabditis elegans OX=6239 GN=mars-1 PE=3 SV=1	2	1	1	1	1			1
O01532	Peptidase A1 domain-containing protein OS=Caenorhabditis elegans OX=6239 GN=asp-5 PE=1 SV=1	4	1	1	1		1			1

## Sheet: Precursor_Abund
Uniprot Accession	Description	Coverage [%]	# Peptides	# PSMs	# Unique Peptides	# AAs	MW [kDa]	Abundance control IP	Abundance DTN-1-FLAG-GFP-IP	Abundance DTN-2-FLAG-GFP-IP	Abundance DTN-1-FLAG-GFP-IP + DTN-2-FLAG-GFP-IP	Found in Sample: [S1] F1: Control IP	Found in Sample: [S2] F2: Sample, DTN-1-FLAG-GFP-IP	Found in Sample: [S3] F3: Sample, DTN-2-FLAG-GFP-IP
cont_P04264	Keratin, type II cytoskeletal 1 OS=Homo sapiens GN=KRT1 PE=1 SV=6	67	50	715	44	644	66	1.86776e+09	9.19526e+08	5.02643e+08	1.42217e+09	High	High	High
cont_P13645	Keratin, type I cytoskeletal 10 OS=Homo sapiens GN=KRT10 PE=1 SV=6	54	34	495	28	584	58.8	7.18917e+08	3.89674e+08	1.84082e+08	5.73756e+08	High	High	High
cont_P35527	Keratin, type I cytoskeletal 9 OS=Homo sapiens GN=KRT9 PE=1 SV=3	77	38	441	37	623	62	6.41315e+08	4.98596e+08	3.1691e+08	8.15506e+08	High	High	High
cont_P35908	Keratin, type II cytoskeletal 2 epidermal OS=Homo sapiens GN=KRT2 PE=1 SV=2	81	54	401	41	639	65.4	4.02135e+08	1.67748e+08	6.40591e+07	2.31808e+08	High	High	High
cont_P02533	Keratin, type I cytoskeletal 14 OS=Homo sapiens GN=KRT14 PE=1 SV=4	65	31	210	9	472	51.5	2.93743e+07	1.80142e+07	1.78279e+07	3.58422e+07	High	High	High
cont_P04259	Keratin, type II cytoskeletal 6B OS=Homo sapiens GN=KRT6B PE=1 SV=5	53	32	204	2	564	60	1.01063e+07	1.09695e+07	1.29371e+07	2.39066e+07	High	High	High
cont_P08779	Keratin, type I cytoskeletal 16 OS=Homo sapiens GN=KRT16 PE=1 SV=4	59	28	203	14	473	51.2	3.30808e+07	2.6504e+07	5.22325e+07	7.87365e+07	High	High	High
cont_P02538	Keratin, type II cytoskeletal 6A OS=Homo sapiens GN=KRT6A PE=1 SV=3	57	35	199	5	564	60	1.93224e+07	2.21424e+07	3.27941e+07	5.49364e+07	High	High	High
cont_P13647	Keratin, type II cytoskeletal 5 OS=Homo sapiens GN=KRT5 PE=1 SV=3	59	40	172	24	590	62.3	8.97452e+07	5.09658e+07	2.95876e+07	8.05535e+07	High	High	High
cont_P00761	Trypsin OS=Sus scrofa PE=1 SV=1	16	3	122	3	231	24.4	5.20211e+09	4.75486e+09	3.9445e+09	8.69936e+09	High	High	High
cont_Q04695	Keratin, type I cytoskeletal 17 OS=Homo sapiens GN=KRT17 PE=1 SV=2	56	25	115	10	432	48.1	5.81631e+06	6.56648e+06	1.05691e+07	1.71356e+07	High	High	High
cont_P13646	Keratin, type I cytoskeletal 13 OS=Homo sapiens GN=KRT13 PE=1 SV=4	39	21	98	13	458	49.6	2.39901e+07		2.26934e+07	2.26934e+07	High	High	High
G5EBT9	Peptidase_M28 domain-containing protein OS=Caenorhabditis elegans OX=6239 GN=CELE_H27A22.1 PE=1 SV=1	31	9	80	9	356	40.3	7.39537e+07	3.74242e+07	8.44584e+06	4.587e+07	High	High	High
cont_P08727	Keratin, type I cytoskeletal 19 OS=Homo sapiens GN=KRT19 PE=1 SV=4	35	17	78	6	400	44.1		6.76338e+06	3.45221e+06	1.02156e+07	High	High	High
cont_P12035	Keratin, type II cytoskeletal 3 OS=Homo sapiens GN=KRT3 PE=1 SV=3	25	18	61	6	628	64.4	1.65363e+08	156783	5.99393e+06	6.15072e+06	High	High	High
P18948	Vitellogenin-6 OS=Caenorhabditis elegans OX=6239 GN=vit-6 PE=1 SV=5	12	18	60	18	1651	193.2	3.18982e+07	7.50655e+06	5.2694e+06	1.27759e+07	High	High	High
cont_P05787	Keratin, type II cytoskeletal 8 OS=Homo sapiens GN=KRT8 PE=1 SV=7	40	23	56	14	483	53.7	107761	1.93082e+07	6.78264e+06	2.60908e+07	High	High	High
O16266	Uncharacterized protein OS=Caenorhabditis elegans OX=6239 GN=CELE_F40A3.6 PE=1 SV=1	31	8	56	8	258	30.2	5.12846e+07	592284	2.00435e+07	2.06358e+07	High	High	High
P02566	Myosin-4 OS=Caenorhabditis elegans OX=6239 GN=unc-54 PE=1 SV=2	16	27	54	27	1963	224.6	5.97466e+06	1.10687e+07	6.63429e+06	1.7703e+07	High	High	High
P37165	Ubiquitin-like protein 1-40S ribosomal protein S27a OS=Caenorhabditis elegans OX=6239 GN=ubl-1 PE=1 SV=2	23	2	54	2	163	18.1	9.1382e+06	7.40339e+06	5.42969e+06	1.28331e+07	High	High	High
H2FLH3	Twitchin OS=Caenorhabditis elegans OX=6239 GN=unc-22 PE=1 SV=1	6	31	50	31	6848	754.1	6.07883e+06	2.65703e+06	3.68205e+06	6.33908e+06	High	High	High
P05690	Vitellogenin-2 OS=Caenorhabditis elegans OX=6239 GN=vit-2 PE=1 SV=5	13	22	48	6	1613	187.6	5.48196e+06	1.17892e+07	2.16809e+06	1.39573e+07	High	High	High
P06125	Vitellogenin-5 OS=Caenorhabditis elegans OX=6239 GN=vit-5 PE=2 SV=2	9	17	47	1	1603	186.3	4.59558e+06	2.64033e+06	1.80759e+06	4.44792e+06	High	High	High
P10984	Actin-2 OS=Caenorhabditis elegans OX=6239 GN=act-2 PE=3 SV=3	34	13	45	6	376	41.8	1.61145e+06	2.03517e+07	9.30618e+06	2.96578e+07	High	High	High
P91128	60S ribosomal protein L13 OS=Caenorhabditis elegans OX=6239 GN=rpl-13 PE=3 SV=1	45	9	45	9	207	23.7	2.33422e+07	1.93018e+07	1.08859e+07	3.01877e+07	High	High	High
cont_Q7Z794	Keratin, type II cytoskeletal 1b OS=Homo sapiens GN=KRT77 PE=2 SV=3	19	11	43	7	578	61.9	1.95686e+06		110588	110588	High	Not Found	High
cont_P19013	Keratin, type II cytoskeletal 4 OS=Homo sapiens GN=KRT4 PE=1 SV=4	27	13	42	6	534	57.3	338660		2.54564e+06	2.54564e+06	High	Not Found	High
O45815	ACTin OS=Caenorhabditis elegans OX=6239 GN=act-5 PE=1 SV=1	24	9	42	2	375	41.8	446602	3.946e+06	1.34204e+06	5.28804e+06	High	High	High
P18947	Vitellogenin-4 OS=Caenorhabditis elegans OX=6239 GN=vit-4 PE=1 SV=3	8	15	42	1	1603	186.2	127402			0	High	Not Found	Not Found
Q9N4J2	Vitellogenin-3 OS=Caenorhabditis elegans OX=6239 GN=vit-3 PE=1 SV=1	9	17	39	2	1603	186.4	781945	221457	132516	353973	High	High	High
Q9N3X2	40S ribosomal protein S4 OS=Caenorhabditis elegans OX=6239 GN=rps-4 PE=1 SV=1	37	9	38	9	259	29	2.01088e+07	1.87976e+07	1.02258e+07	2.90234e+07	High	High	High
P55155	Vitellogenin-1 OS=Caenorhabditis elegans OX=6239 GN=vit-1 PE=1 SV=2	11	18	37	2	1616	187.9	339694	642092	146521	788614	High	High	High
P48156	40S ribosomal protein S8 OS=Caenorhabditis elegans OX=6239 GN=rps-8 PE=3 SV=1	51	8	37	8	208	23.7	8.57675e+06	7.93352e+06	5.46005e+06	1.33936e+07	High	High	High
Q19869	60S ribosomal protein L26 OS=Caenorhabditis elegans OX=6239 GN=rpl-26 PE=3 SV=1	25	5	37	5	142	16.1	4.61964e+07	3.75688e+07	2.70747e+07	6.46435e+07	High	High	High
P53013	Elongation factor 1-alpha OS=Caenorhabditis elegans OX=6239 GN=eft-3 PE=3 SV=1	23	10	36	10	463	50.6	2.51271e+07	2.10283e+07	1.65359e+07	3.75642e+07	High	High	High
P49181	60S ribosomal protein L36 OS=Caenorhabditis elegans OX=6239 GN=rpl-36 PE=1 SV=3	45	6	36	6	104	11.9	2.94824e+07	2.00388e+07	8.43792e+06	2.84767e+07	High	High	High
Q19864	WD_REPEATS_REGION domain-containing protein OS=Caenorhabditis elegans OX=6239 GN=cpf-1 PE=1 SV=1	42	14	33	14	430	47.9	1.87122e+07	1.3901e+07	3.33739e+06	1.72384e+07	High	High	High
O45946	60S ribosomal protein L18 OS=Caenorhabditis elegans OX=6239 GN=rpl-18 PE=3 SV=1	28	6	31	6	188	21	1.82004e+07	2.28205e+07	1.01446e+07	3.29651e+07	High	High	High
Q27894	Histone H2B 2 OS=Caenorhabditis elegans OX=6239 GN=his-4 PE=1 SV=3	34	4	29	4	123	13.6	9.37884e+06	2.26913e+07	2.11457e+07	4.3837e+07	High	High	High
P42001	Protection of telomeres homolog 1 OS=Caenorhabditis elegans OX=6239 GN=pot-1 PE=2 SV=3	13	7	29	7	400	46.5		8.65861e+06	5.13226e+06	1.37909e+07	Not Found	High	High
cont_P08729	Keratin, type II cytoskeletal 7 OS=Homo sapiens GN=KRT7 PE=1 SV=5	12	8	29	1	469	51.4		289140		289140	Not Found	High	Not Found
cont_Q8N1N4	Keratin, type II cytoskeletal 78 OS=Homo sapiens GN=KRT78 PE=2 SV=2	25	15	29	12	520	56.8	3.92147e+06	1.77448e+06	1.15755e+06	2.93203e+06	High	High	High
Q966C6	60S ribosomal protein L7a OS=Caenorhabditis elegans OX=6239 GN=rpl-7A PE=1 SV=3	39	11	28	11	265	30.2	1.99108e+07	1.7945e+07	1.12552e+07	2.92002e+07	High	High	High
cont_P02769	Serum albumin OS=Bos taurus GN=ALB PE=1 SV=4	10	7	28	7	607	69.2	1.71481e+06	7.33221e+07	5.83798e+06	7.91601e+07	High	High	High
Q22716	Ribosomal Protein, Large subunit OS=Caenorhabditis elegans OX=6239 GN=rpl-32 PE=1 SV=1	36	5	27	5	134	15.5	2.07239e+07	2.27031e+07	1.06238e+07	3.33269e+07	High	High	High
Q21930	60S ribosomal protein L28 OS=Caenorhabditis elegans OX=6239 GN=rpl-28 PE=1 SV=3	48	7	26	7	126	13.7	5.67735e+07	4.91574e+07	3.50056e+07	8.4163e+07	High	High	High
cont_Q7RTS7	Keratin, type II cytoskeletal 74 OS=Homo sapiens GN=KRT74 PE=1 SV=2	9	7	26	1	529	57.8	2.52883e+06		727039	727039	High	High	High
O18240	Ribosomal Protein, Small subunit OS=Caenorhabditis elegans OX=6239 GN=rps-18 PE=1 SV=1	46	6	26	6	154	17.8	8.83274e+06	7628175	7.63639e+06	1.52646e+07	High	High	High
Q9XVF7	60S ribosomal protein L8 OS=Caenorhabditis elegans OX=6239 GN=rpl-2 PE=3 SV=1	28	9	25	9	260	28.2	9.71184e+06	7.59414e+06	3.79263e+06	1.13868e+07	High	High	High
Q9N5S7	ThioredoXin Domain Containing protein homolog OS=Caenorhabditis elegans OX=6239 GN=txdc-12.2 PE=1 SV=1	33	6	25	6	257	30.2	1.42588e+07	6.07102e+06	2.84722e+06	8.91824e+06	High	High	High
Q22429	Uncharacterized protein OS=Caenorhabditis elegans OX=6239 GN=CELE_T12E12.3 PE=1 SV=1	19	12	25	8	818	92.8			1.69331e+07	1.69331e+07	Not Found	Not Found	High
O18650	40S ribosomal protein S19 OS=Caenorhabditis elegans OX=6239 GN=rps-19 PE=2 SV=1	42	7	24	7	146	16.3	1.04759e+07	1.47934e+07	4.09156e+06	1.8885e+07	High	High	High
P62784	Histone H4 OS=Caenorhabditis elegans OX=6239 GN=his-1 PE=1 SV=2	42	5	23	5	103	11.4	5057347	4.92744e+06	1.96685e+06	6.89429e+06	High	High	High
Q9NEN6	40S ribosomal protein S6 OS=Caenorhabditis elegans OX=6239 GN=rps-6 PE=1 SV=1	21	5	22	5	246	28.1	3.81362e+06	2.38777e+06	1.80853e+06	4.1963e+06	High	High	High
cont_Q6KB66	Keratin, type II cytoskeletal 80 OS=Homo sapiens GN=KRT80 PE=1 SV=2	17	7	21	6	452	50.5	1.43232e+06	320351		320351	High	High	Not Found
Q20206	Ribosomal_S17_N domain-containing protein OS=Caenorhabditis elegans OX=6239 GN=rps-11 PE=1 SV=1	26	5	20	5	155	17.7	8.61557e+06	9.72602e+06	4.79761e+06	1.45236e+07	High	High	High
cont_P05783	Keratin, type I cytoskeletal 18 OS=Homo sapiens GN=KRT18 PE=1 SV=2	24	8	20	6	430	48		3.97702e+06	728488	4.70551e+06	Not Found	High	High
O01868	60S ribosomal protein L24 OS=Caenorhabditis elegans OX=6239 GN=rpl-24.1 PE=3 SV=1	36	7	19	7	159	17.8	1.70974e+07	1.25187e+07	1.54182e+06	1.40605e+07	High	High	High
P47991	60S ribosomal protein L6 OS=Caenorhabditis elegans OX=6239 GN=rpl-6 PE=1 SV=1	29	6	18	6	217	24.3	5.40385e+06	7.2629e+06	2.27183e+06	9.53473e+06	High	High	High
P48154	40S ribosomal protein S3a OS=Caenorhabditis elegans OX=6239 GN=rps-1 PE=3 SV=2	37	9	18	9	257	28.9	9.83984e+06	5.79701e+06	4.18131e+06	9.97832e+06	High	High	High
A3QMC5	Ribosomal Protein, Large subunit OS=Caenorhabditis elegans OX=6239 GN=rpl-34 PE=1 SV=1	34	5	17	5	110	12.7	3.62665e+07	3.59002e+07	2.18472e+07	5.77474e+07	High	High	High
O44480	60S ribosomal protein L18a OS=Caenorhabditis elegans OX=6239 GN=rpl-20 PE=3 SV=2	27	4	17	4	180	20.9	4.93482e+06	6.1444e+06	1.32618e+06	7.47059e+06	High	High	High
O02056	60S ribosomal protein L4 OS=Caenorhabditis elegans OX=6239 GN=rpl-4 PE=1 SV=3	27	8	16	8	345	38.6	4.81613e+06	3.80629e+06	887338	4.69363e+06	High	High	High
P49180	60S ribosomal protein L35a OS=Caenorhabditis elegans OX=6239 GN=rpl-33 PE=1 SV=3	44	6	16	6	124	13.8	2.69126e+06	9.30723e+06	540462	9.84769e+06	High	High	High
O02639	60S ribosomal protein L19 OS=Caenorhabditis elegans OX=6239 GN=rpl-19 PE=3 SV=1	18	3	16	3	198	23.6	7834246	9.88554e+06	6.12987e+06	1.60154e+07	High	High	High
Q93637	Uncharacterized protein OS=Caenorhabditis elegans OX=6239 GN=hpo-34 PE=1 SV=3	7	5	16	5	772	85.6	8.96371e+06	855544	1.40168e+07	1.48724e+07	High	High	High
G5ED07	Protein disulfide-isomerase OS=Caenorhabditis elegans OX=6239 GN=pdi-3 PE=1 SV=1	15	7	15	7	488	54.9	7.87019e+06	4.59318e+06	1.14481e+06	5.73799e+06	High	High	High
O01802	60S ribosomal protein L7 OS=Caenorhabditis elegans OX=6239 GN=rpl-7 PE=3 SV=1	33	9	15	9	244	28.1	2.9654e+06	1.9247e+06	510585	2.43529e+06	High	High	High
O62329	Uncharacterized protein OS=Caenorhabditis elegans OX=6239 GN=CELE_R06A4.2 PE=1 SV=1	13	11	14	7	837	95		7.15293e+06		7.15293e+06	Not Found	High	Not Found
Q95Y04	40S ribosomal protein S28 OS=Caenorhabditis elegans OX=6239 GN=rps-28 PE=3 SV=1	51	3	14	3	65	7.4	6.44149e+06	8.16346e+06	5.5068e+06	1.36703e+07	High	High	High
P52819	60S ribosomal protein L22 OS=Caenorhabditis elegans OX=6239 GN=rpl-22 PE=1 SV=3	32	4	13	4	130	14.9	2.95077e+06	4.07394e+06	1.7412e+06	5.81513e+06	High	High	High
Q21614	Alpha-carbonic anhydrase domain-containing protein OS=Caenorhabditis elegans OX=6239 GN=cah-4 PE=1 SV=3	23	6	13	6	280	31.3	1.07335e+07	1.39197e+06	1.38739e+06	2.77936e+06	High	High	High
Q565D1	Uncharacterized protein OS=Caenorhabditis elegans OX=6239 GN=CELE_F49E2.5 PE=1 SV=1	10	9	13	9	1100	121.6	3.59021e+06		1.49349e+06	1.49349e+06	High	Not Found	High
O62388	Ribosomal protein L37 OS=Caenorhabditis elegans OX=6239 GN=CELE_W01D2.1 PE=1 SV=1	28	3	12	3	92	10.5	1.45241e+07	1.40286e+07	5.08928e+06	1.91179e+07	High	High	High
O01869	S10_plectin domain-containing protein OS=Caenorhabditis elegans OX=6239 GN=rps-10 PE=1 SV=1	29	3	12	3	149	16.9	2.96156e+06	3.47546e+06	1.84904e+06	5.3245e+06	High	High	High
P48166	Ribosomal protein rpl-36.A OS=Caenorhabditis elegans OX=6239 GN=rpl-36.A PE=3 SV=2	19	2	12	2	105	12.4	1.03925e+07	5.65983e+06	3.93382e+06	9.59366e+06	High	High	High
O45499	40S ribosomal protein S26 OS=Caenorhabditis elegans OX=6239 GN=rps-26 PE=3 SV=1	26	3	12	3	117	13.2	9.88724e+06	1.10006e+07	8.44661e+06	1.94472e+07	High	High	High
O17570	60S ribosomal protein L38 OS=Caenorhabditis elegans OX=6239 GN=rpl-38 PE=3 SV=2	29	3	11	3	70	8.1	3.58528e+06	5.71005e+06	2.20053e+06	7.91058e+06	High	High	High
Q17770	Protein disulfide-isomerase 2 OS=Caenorhabditis elegans OX=6239 GN=pdi-2 PE=1 SV=1	18	8	11	8	493	55.1	3.48569e+06	495609		495609	High	High	Not Found
Q22054	40S ribosomal protein S16 OS=Caenorhabditis elegans OX=6239 GN=rps-16 PE=1 SV=3	36	5	11	5	144	16.3	3.83931e+06	2.59082e+06	1.36438e+06	3.95519e+06	High	High	High
P34334	60S ribosomal protein L21 OS=Caenorhabditis elegans OX=6239 GN=rpl-21 PE=3 SV=3	34	5	11	5	161	18.3	5.1279e+06	6.32239e+06	4.31333e+06	1.06357e+07	High	High	High
G5EEC0	60S ribosomal protein L3 OS=Caenorhabditis elegans OX=6239 GN=rpl-3 PE=1 SV=1	21	8	11	8	303	34.7	2.01506e+06	1.45893e+06	1.08245e+06	2.54138e+06	High	High	High
Q966I7	CCHC-type domain-containing protein OS=Caenorhabditis elegans OX=6239 GN=CELE_K08D12.3 PE=1 SV=1	40	6	11	6	151	15.5	1.54041e+06		1.61645e+06	1.61645e+06	High	Not Found	High
P52821	40S ribosomal protein S25 OS=Caenorhabditis elegans OX=6239 GN=rps-25 PE=3 SV=1	22	3	11	3	117	12.9	5.55927e+06	6.65905e+06	3.88229e+06	1.05413e+07	High	High	High
P09446	Heat shock 70 kDa protein A OS=Caenorhabditis elegans OX=6239 GN=hsp-1 PE=1 SV=2	11	6	10	3	640	69.7	359468	721219	339644	1.06086e+06	High	High	High
P51404	40S ribosomal protein S13 OS=Caenorhabditis elegans OX=6239 GN=rps-13 PE=3 SV=2	18	2	10	2	151	17.3	5.63257e+06	5.60917e+06	3.98938e+06	9.59855e+06	High	High	High
Q9XVE9	Ribosomal_L14e domain-containing protein OS=Caenorhabditis elegans OX=6239 GN=rpl-14 PE=1 SV=1	18	2	10	2	135	15.3	1.01994e+07	1.06661e+07	6.31969e+06	1.69858e+07	High	High	High
P91914	60S ribosomal protein L27 OS=Caenorhabditis elegans OX=6239 GN=rpl-27 PE=2 SV=1	29	5	10	5	136	15.7	2.02479e+06	2.19907e+06	1.32662e+06	3.52569e+06	High	High	High
Q18529	Uncharacterized protein OS=Caenorhabditis elegans OX=6239 GN=C39D10.7 PE=1 SV=3	5	5	9	5	1171	128.7	722582	811915	220234	1.03215e+06	High	High	High
P48150	40S ribosomal protein S14 OS=Caenorhabditis elegans OX=6239 GN=rps-14 PE=3 SV=1	30	3	9	3	152	16.2	2.46e+06	2.35833e+06	1.37607e+06	3.7344e+06	High	High	High
P49632	Ubiquitin-60S ribosomal protein L40 OS=Caenorhabditis elegans OX=6239 GN=ubq-2 PE=3 SV=2	23	3	9	3	128	14.6	2.44474e+06	4.23843e+06	1.47818e+06	5.71661e+06	High	High	High
P48152	40S ribosomal protein S3 OS=Caenorhabditis elegans OX=6239 GN=rps-3 PE=3 SV=1	18	5	9	5	247	27.3	2.99694e+06	1539875	1.17706e+06	2.71693e+06	High	High	High
P19625	Myosin regulatory light chain 1 OS=Caenorhabditis elegans OX=6239 GN=mlc-1 PE=4 SV=1	21	3	9	3	170	18.6	1.20497e+06	405968	267545	673513	High	High	High
Q9BL19	60S ribosomal protein L17 OS=Caenorhabditis elegans OX=6239 GN=rpl-17 PE=3 SV=1	19	4	9	4	187	21.5	3.24573e+06	2.43571e+06	350090	2.7858e+06	High	High	High
Q20228	40S ribosomal protein S9 OS=Caenorhabditis elegans OX=6239 GN=rps-9 PE=3 SV=1	23	5	9	5	189	21.9	4.21866e+06	4685422	1.11517e+06	5.80059e+06	High	High	High
Q9BKU6	Ribosomal_L18e/L15P domain-containing protein OS=Caenorhabditis elegans OX=6239 GN=CELE_Y37E3.8 PE=1 SV=1	47	4	9	4	88	9.8	2.67031e+06	2.72359e+06	1.57093e+06	4.29452e+06	High	High	High
Q18688	Heat shock protein 90 OS=Caenorhabditis elegans OX=6239 GN=daf-21 PE=1 SV=1	9	5	9	5	702	80.2	924765	1.01063e+06	310239	1.32087e+06	High	High	High
Q18231	40S ribosomal protein S30 OS=Caenorhabditis elegans OX=6239 GN=rps-30 PE=1 SV=1	8	2	8	2	130	14	5.57686e+06	6.73792e+06	2.7496e+06	9.48752e+06	High	High	High
H2KYR1	HABP4_PAI-RBP1 domain-containing protein OS=Caenorhabditis elegans OX=6239 GN=vig-1 PE=1 SV=1	17	5	8	5	378	40.4	5.42057e+06		2.09338e+06	2.09338e+06	High	Not Found	High
Q11067	Protein disulfide-isomerase A6 homolog OS=Caenorhabditis elegans OX=6239 GN=pdi-6 PE=3 SV=1	19	5	8	5	440	47.7	1.02533e+06	437639		437639	High	High	Not Found
cont_Q9C075	Keratin, type I cytoskeletal 23 OS=Homo sapiens GN=KRT23 PE=1 SV=2	7	3	8	1	422	48.1	110317			0	High	Not Found	Not Found
Q8WQA8	Ribosomal_S10 domain-containing protein OS=Caenorhabditis elegans OX=6239 GN=rps-20 PE=1 SV=1	29	3	7	3	117	13.2	1.27035e+06	1.63121e+06	739759	2.37096e+06	High	High	High
P27420	Heat shock 70 kDa protein C OS=Caenorhabditis elegans OX=6239 GN=hsp-3 PE=1 SV=2	6	4	7	1	661	73		518445	368481	886927	Not Found	High	High
P34662	60S ribosomal protein L35 OS=Caenorhabditis elegans OX=6239 GN=rpl-35 PE=3 SV=1	24	3	7	3	123	14.2	1.41102e+07	1.08592e+07	8.04057e+06	1.88998e+07	High	High	High
Q9UB28	Myotactin form B OS=Caenorhabditis elegans OX=6239 GN=let-805 PE=1 SV=1	1	3	7	3	4450	497.2	435853		206885	206885	High	High	High
P29691	Elongation factor 2 OS=Caenorhabditis elegans OX=6239 GN=eef-2 PE=1 SV=4	4	4	7	4	852	94.7	1.71494e+06	1.37592e+06	462158	1.83807e+06	High	High	High
Q09533	60S ribosomal protein L10 OS=Caenorhabditis elegans OX=6239 GN=rpl-10 PE=3 SV=1	18	4	6	4	214	24.7	2.33092e+06	2.66251e+06		2.66251e+06	High	High	Not Found
Q95Y46	Ribosomal protein OS=Caenorhabditis elegans OX=6239 GN=rpl-1 PE=1 SV=1	23	3	6	3	155	17.1	1.48091e+06	1.00328e+06	511745	1.51502e+06	High	High	High
Q09610	Probable galaptin lec-8 OS=Caenorhabditis elegans OX=6239 GN=lec-8 PE=2 SV=2	20	3	6	3	180	20.4	1.25951e+06	911985		911985	High	High	Not Found
Q10454	Probable arginine kinase F46H5.3 OS=Caenorhabditis elegans OX=6239 GN=F46H5.3 PE=3 SV=2	12	4	6	4	396	44.1	1.72519e+06	615376		615376	High	High	Not Found
Q20647	60S ribosomal protein L23a 2 OS=Caenorhabditis elegans OX=6239 GN=rpl-25.2 PE=3 SV=1	23	3	6	2	146	16.3	3.46141e+06	1.24935e+06	2.21429e+06	3.46364e+06	High	High	High
Q1XFY9	Ribosomal Protein, Small subunit OS=Caenorhabditis elegans OX=6239 GN=rps-24 PE=1 SV=1	11	1	6	1	131	14.9	2835518	2.91796e+06	2.18286e+06	5.10083e+06	High	High	High
P10567	Paramyosin OS=Caenorhabditis elegans OX=6239 GN=unc-15 PE=1 SV=2	4	3	6	3	872	100.6	507737	639666		639666	High	High	Not Found
P43510	Cathepsin B-like cysteine proteinase 6 OS=Caenorhabditis elegans OX=6239 GN=cpr-6 PE=1 SV=1	8	2	5	2	379	42.4	119967	512807	136849	649655	High	High	High
O44145	PERMeable eggshell OS=Caenorhabditis elegans OX=6239 GN=perm-2 PE=1 SV=2	5	2	5	2	203	22.4	756889		289535	289535	High	Not Found	High
P52275	Tubulin beta-2 chain OS=Caenorhabditis elegans OX=6239 GN=tbb-2 PE=1 SV=1	8	3	5	1	450	50.3		324250		324250	High	High	Not Found
Q20007	Uncharacterized protein OS=Caenorhabditis elegans OX=6239 GN=CELE_F35A5.1 PE=1 SV=4	6	4	5	4	2311	252.3	660647		236810	236810	High	Not Found	High
Q18066	Disorganized muscle protein 1 OS=Caenorhabditis elegans OX=6239 GN=dim-1 PE=1 SV=3	9	4	5	4	640	71.8	1.35559e+06		223648	223648	High	Not Found	High
O01692	40S ribosomal protein S17 OS=Caenorhabditis elegans OX=6239 GN=rps-17 PE=3 SV=2	20	2	5	2	130	14.9	1.34219e+06	942943	438905	1.38185e+06	High	High	High
Q9NA78	Thioredoxin domain-containing protein OS=Caenorhabditis elegans OX=6239 GN=txdc-12.1 PE=1 SV=1	11	3	5	3	186	21.5	530786	1.82791e+06		1.82791e+06	High	High	Not Found
Q9XXK1	ATP synthase subunit alpha, mitochondrial OS=Caenorhabditis elegans OX=6239 GN=atp-1 PE=1 SV=1	5	3	5	3	538	57.8	6.84979e+06	7.74924e+06	2.10045e+06	9.84969e+06	High	High	High
Q20363	Stress-induced protein 1 OS=Caenorhabditis elegans OX=6239 GN=sip-1 PE=1 SV=1	21	2	5	2	159	17.8	204027	757865		757865	High	High	Not Found
Q19877	40S ribosomal protein S23 OS=Caenorhabditis elegans OX=6239 GN=rps-23 PE=3 SV=1	24	3	5	3	143	15.9	166726	2.72064e+06	478225	3.19887e+06	High	High	High
Q18885	Transcription factor BTF3 homolog OS=Caenorhabditis elegans OX=6239 GN=icd-1 PE=1 SV=1	27	2	5	2	161	17.5		5.60286e+06	207362	5.81022e+06	High	High	High
Q23050	CaLponIn-liKe proteins OS=Caenorhabditis elegans OX=6239 GN=clik-1 PE=1 SV=1	12	4	5	4	406	44.3	85984.1	75370.6	774372	849742	High	High	High
P12456	Tubulin beta-1 chain OS=Caenorhabditis elegans OX=6239 GN=mec-7 PE=2 SV=1	8	3	5	1	441	49.2		627341	314180	941522	Not Found	High	High
P51403	40S ribosomal protein S2 OS=Caenorhabditis elegans OX=6239 GN=rps-2 PE=3 SV=1	14	4	5	4	272	28.9	964065		1.42803e+06	1.42803e+06	High	Not Found	High
Q9U2A8	60S ribosomal protein L37a OS=Caenorhabditis elegans OX=6239 GN=rpl-43 PE=3 SV=3	30	2	5	2	91	10.1	825420	675058		675058	High	High	Not Found
Q4W5P0	Homologous to Drosophila SQD (Squid) protein OS=Caenorhabditis elegans OX=6239 GN=sqd-1 PE=1 SV=1	5	1	4	1	308	33.7	298345		362241	362241	High	Not Found	High
Q23258	Uncharacterized protein OS=Caenorhabditis elegans OX=6239 GN=CELE_ZC373.2 PE=1 SV=2	43	3	4	3	104	11.1	409296	91726.4		91726.4	High	High	Not Found
P46561	ATP synthase subunit beta, mitochondrial OS=Caenorhabditis elegans OX=6239 GN=atp-2 PE=1 SV=2	6	2	4	2	538	57.5		925040	319055	1.2441e+06	Not Found	High	High
A0A2C9C3A7	Nuclear anchorage protein 1 OS=Caenorhabditis elegans OX=6239 GN=anc-1 PE=1 SV=1	2	4	4	4	8538	955.2	455119			0	High	Not Found	Not Found
P37806	Protein unc-87 OS=Caenorhabditis elegans OX=6239 GN=unc-87 PE=1 SV=3	4	2	4	2	565	62.7	309447	140489	202378	342868	High	High	High
Q27485	Histone H2A OS=Caenorhabditis elegans OX=6239 GN=his-35 PE=3 SV=1	13	2	4	2	127	13.4	2.92424e+06	3820280	365349	4.18563e+06	High	High	High
Q17967	Protein disulfide-isomerase 1 OS=Caenorhabditis elegans OX=6239 GN=pdi-1 PE=3 SV=1	8	3	4	3	485	53.4	257016		80495.5	80495.5	High	Not Found	High
Q9XWC3	DOMON domain-containing protein Y73F4A.2 OS=Caenorhabditis elegans OX=6239 GN=Y73F4A.2 PE=1 SV=1	29	2	4	2	168	18.9	351114	693211	74534.1	767745	High	High	High
H2L044	Prion-like-(Q/N-rich)-domain-bearing protein OS=Caenorhabditis elegans OX=6239 GN=pqn-52 PE=1 SV=1	10	2	4	2	252	28.7	480516	138038		138038	High	High	High
A0A2I2LDV7	Titin homolog OS=Caenorhabditis elegans OX=6239 GN=ttn-1 PE=1 SV=1	4	4	4	4	15173	1679.9	550679			0	High	Not Found	Not Found
G5EC04	Calcium-transporting ATPase OS=Caenorhabditis elegans OX=6239 GN=mca-1 PE=1 SV=1	1	2	4	2	1249	136.8	569743		1.92467e+06	1.92467e+06	High	Not Found	High
Q17832	ViGiLN homolog OS=Caenorhabditis elegans OX=6239 GN=vgln-1 PE=1 SV=2	2	3	4	3	1220	134.3	525789		207627	207627	High	Not Found	High
Q9NEW6	Probable splicing factor, arginine/serine-rich 3 OS=Caenorhabditis elegans OX=6239 GN=rsp-3 PE=1 SV=2	4	1	3	1	258	28.7	368740	294422	157831	452252	High	High	High
A0A5E4M2N5	Uncharacterized protein OS=Caenorhabditis elegans OX=6239 GN=CELE_T23E7.2 PE=1 SV=1	6	3	3	3	954	103.9	408980			0	High	Not Found	Not Found
P34339	Eukaryotic translation initiation factor 3 subunit A OS=Caenorhabditis elegans OX=6239 GN=egl-45 PE=3 SV=1	2	2	3	2	1076	124.3	881148		1.48016e+06	1.48016e+06	High	Not Found	High
Q9XWT3	Uterine Lumin Expressed/locailized OS=Caenorhabditis elegans OX=6239 GN=ule-5 PE=1 SV=1	7	1	3	1	181	19.5	88949.8	77354	29655.2	107009	High	High	High
G5EC10	Galectin OS=Caenorhabditis elegans OX=6239 GN=lec-9 PE=1 SV=1	19	2	3	2	140	15.5	134075		23996.6	23996.6	High	Not Found	High
Q9XVR8	Putative H/ACA ribonucleoprotein complex subunit 3 OS=Caenorhabditis elegans OX=6239 GN=nola-3 PE=3 SV=2	36	2	3	2	64	7.5	4.64034e+06		1.33645e+06	1.33645e+06	High	Not Found	High
P48162	60S ribosomal protein L23a 1 OS=Caenorhabditis elegans OX=6239 GN=rpl-25.1 PE=3 SV=1	16	2	3	1	147	16.7	223412		175195	175195	High	Not Found	High
Q9U332	60S ribosomal protein L31 OS=Caenorhabditis elegans OX=6239 GN=rpl-31 PE=3 SV=1	13	2	3	2	122	14.3	1.14313e+06	424058	1.16315e+06	1.58721e+06	High	High	High
H2L0I4	Lin-5 (Five) Interacting protein OS=Caenorhabditis elegans OX=6239 GN=lfi-1 PE=1 SV=2	2	3	3	3	2392	273.8	516641			0	High	Not Found	Not Found
O45097	Uncharacterized protein OS=Caenorhabditis elegans OX=6239 GN=CELE_F57H12.6 PE=1 SV=2	8	2	3	2	205	23.7	926492	675713		675713	High	High	Not Found
Q95Y90	60S ribosomal protein L9 OS=Caenorhabditis elegans OX=6239 GN=rpl-9 PE=3 SV=1	15	2	3	2	189	21.5	324021	181638		181638	High	High	Not Found
P49405	60S ribosomal protein L5 OS=Caenorhabditis elegans OX=6239 GN=rpl-5 PE=3 SV=1	15	3	3	3	293	33.4	513014			0	High	Not Found	Not Found
Q9N4F2	Mediator of RNA polymerase II transcription subunit 19 OS=Caenorhabditis elegans OX=6239 GN=mdt-19 PE=3 SV=1	5	1	3	1	199	22.8	76685.8	1.89654e+06		1.89654e+06	High	High	Not Found
B7FAR9	Uncharacterized protein OS=Caenorhabditis elegans OX=6239 GN=CELE_Y43F8B.1 PE=1 SV=1	5	2	3	2	711	78.6	134437		55481.7	55481.7	High	Not Found	High
O17406	AT hook Transcription Factor family OS=Caenorhabditis elegans OX=6239 GN=attf-2 PE=1 SV=1	8	3	3	3	415	44.3	360206			0	High	Not Found	Not Found
cont_P02662	Alpha-S1-casein OS=Bos taurus GN=CSN1S1 PE=1 SV=2	3	1	3	1	214	24.5	372655	302078	113915	415993	High	High	High
G5EBF3	Protein Up-regulated in Daf-2(Gf) OS=Caenorhabditis elegans OX=6239 GN=pud-2.1 PE=1 SV=1	14	2	3	2	154	17.4	357823		249794	249794	High	Not Found	High
Q9XWU9	Uncharacterized protein OS=Caenorhabditis elegans OX=6239 GN=CELE_Y37D8A.19 PE=1 SV=1	11	1	3	1	101	10.3	941865	622547	620863	1.24341e+06	High	High	High
A0A5S9MRZ2	Uncharacterized protein OS=Caenorhabditis elegans OX=6239 GN=CELE_F54H12.10 PE=4 SV=1	17	1	3	1	99	10.6	391107	250147	873986	1.12413e+06	High	High	High
O17694	RNAi-Induced Longevity OS=Caenorhabditis elegans OX=6239 GN=ril-1 PE=1 SV=1	6	1	2	1	139	16.5	382122		227987	227987	High	Not Found	High
Q20476	BTB domain-containing protein OS=Caenorhabditis elegans OX=6239 GN=CELE_F46G10.1 PE=1 SV=3	12	2	2	2	178	20.4	599207			0	High	Not Found	Not Found
Q19162	60S ribosomal protein L11-2 OS=Caenorhabditis elegans OX=6239 GN=rpl-11.2 PE=3 SV=1	7	1	2	1	196	22.8		435198	243118	678316	Not Found	High	High
P02567	Myosin-1 OS=Caenorhabditis elegans OX=6239 GN=myo-1 PE=1 SV=3	1	2	2	2	1938	223.2	127591			0	High	Not Found	Not Found
P17330	Glyceraldehyde-3-phosphate dehydrogenase 3 OS=Caenorhabditis elegans OX=6239 GN=gpd-3 PE=3 SV=1	2	1	2	1	341	36.4		5.38347e+06	2.32586e+06	7709328	Not Found	High	High
D0PV95	ATP-dependent RNA helicase laf-1 OS=Caenorhabditis elegans OX=6239 GN=laf-1 PE=1 SV=1	3	2	2	2	708	76.3			172662	172662	Not Found	Not Found	High
P34329	Probable protein disulfide-isomerase A4 OS=Caenorhabditis elegans OX=6239 GN=C14B9.2 PE=3 SV=2	1	1	2	1	618	69.8	139023		85556.4	85556.4	High	Not Found	High
cont_P02666	Beta-casein OS=Bos taurus GN=CSN2 PE=1 SV=2	3	1	2	1	224	25.1	2.91915e+06	2.52123e+06		2.52123e+06	High	High	Not Found
Q9NEY7	Uncharacterized protein OS=Caenorhabditis elegans OX=6239 GN=CELE_Y105E8A.11 PE=1 SV=1	10	1	2	1	106	11.4	321471	236395		236395	High	High	Not Found
O17861	GILT-like protein F37H8.5 OS=Caenorhabditis elegans OX=6239 GN=F37H8.5 PE=1 SV=1	6	2	2	2	277	30.8	959885			0	High	High	Not Found
Q94162	TIL domain-containing protein OS=Caenorhabditis elegans OX=6239 GN=C10G8.4 PE=1 SV=1	8	1	2	1	98	10.8	240909	307300		307300	High	High	Not Found
Q9TXP0	40S ribosomal protein S27 OS=Caenorhabditis elegans OX=6239 GN=rps-27 PE=1 SV=3	16	1	2	1	83	9.3	379375	423762		423762	High	High	Not Found
Q5ZET1	Kappa casein (Fragment) OS=Bos taurus GN=csn3 PE=4 SV=1	8	1	2	1	139	15.2	261384			0	High	Not Found	Not Found
G5EEV5	5C820 OS=Caenorhabditis elegans OX=6239 GN=pud-3 PE=1 SV=1	6	1	2	1	172	19.4	182152			0	High	Not Found	Not Found
Q19698	Invertebrate LYSozyme OS=Caenorhabditis elegans OX=6239 GN=ilys-5 PE=1 SV=1	17	2	2	2	139	15.1	774042			0	High	Not Found	Not Found
P27604	Adenosylhomocysteinase OS=Caenorhabditis elegans OX=6239 GN=ahcy-1 PE=3 SV=1	5	2	2	2	437	47.5	186672			0	High	Not Found	Not Found
Q21531	MIF4G domain-containing protein OS=Caenorhabditis elegans OX=6239 GN=ifg-1 PE=1 SV=1	2	1	2	1	1156	129.2	55415		60324.3	60324.3	High	Not Found	High
Q95XT1	SUPpressor of Rpm-1 OS=Caenorhabditis elegans OX=6239 GN=supr-1 PE=4 SV=1	1	1	2	1	746	85.1		1.19578e+06		1.19578e+06	Not Found	High	Not Found
O76840	Papilin OS=Caenorhabditis elegans OX=6239 GN=mig-6 PE=1 SV=1	0	1	2	1	2167	237.4	133986	217611		217611	High	High	Not Found
P10299	Glutathione S-transferase P OS=Caenorhabditis elegans OX=6239 GN=gst-1 PE=1 SV=1	10	2	2	2	208	23.9	225719			0	High	Not Found	Not Found
G5EE42	N-acetyltransferase domain-containing protein OS=Caenorhabditis elegans OX=6239 GN=CELE_ZK1098.11 PE=1 SV=1	28	2	2	2	100	11.6	342840			0	High	Not Found	Not Found
cont_P15636	Protease I precursor Lysyl endopeptidase Achromobacter lyticus.	3	1	2	1	653	68.1	3.39984e+06			0	High	Not Found	Not Found
Q9GRZ9	Transmembrane and Coiled-Coil protein OS=Caenorhabditis elegans OX=6239 GN=tcc-1 PE=1 SV=1	2	1	2	1	676	75.8	440966		489332	489332	High	Not Found	High
O76743	ATP-dependent RNA helicase glh-4 OS=Caenorhabditis elegans OX=6239 GN=glh-4 PE=1 SV=2	2	1	2	1	1156	120.6	66145.9		52575.7	52575.7	High	Not Found	High
Q93572	60S acidic ribosomal protein P0 OS=Caenorhabditis elegans OX=6239 GN=rla-0 PE=1 SV=3	10	2	2	2	312	33.8		100745	268034	368780	Not Found	High	High
Q18318	RRM domain-containing protein OS=Caenorhabditis elegans OX=6239 GN=rbmx-2 PE=1 SV=1	4	1	2	1	302	35.3	322017		449141	449141	High	Not Found	High
Q27504	Putative carbonic anhydrase 3 OS=Caenorhabditis elegans OX=6239 GN=cah-3 PE=3 SV=1	7	1	2	1	246	28.1	452681	393807		393807	High	High	Not Found
A0A486WWC6	Uncharacterized protein OS=Caenorhabditis elegans OX=6239 GN=CELE_Y37E3.17 PE=1 SV=1	2	2	2	2	840	92.8	40788.9	388604		388604	High	High	Not Found
P91253	Probable glutathione S-transferase 7 OS=Caenorhabditis elegans OX=6239 GN=gst-7 PE=3 SV=1	11	2	2	2	206	23.1	280307			0	High	Not Found	Not Found
Q966L9	ATP-dependent RNA helicase glh-2 OS=Caenorhabditis elegans OX=6239 GN=glh-2 PE=1 SV=1	2	1	2	1	974	100.3	148359		156053	156053	High	Not Found	High
Q9XWT5	Uncharacterized protein OS=Caenorhabditis elegans OX=6239 GN=CELE_Y62H9A.3 PE=1 SV=1	7	2	2	2	214	24	152953	37428.5		37428.5	High	High	Not Found
P34383	Fatty-acid and retinol-binding protein 2 OS=Caenorhabditis elegans OX=6239 GN=far-2 PE=3 SV=1	4	1	1	1	182	20	143734			0	High	Not Found	Not Found
Q22540	Uncharacterized protein OS=Caenorhabditis elegans OX=6239 GN=CELE_T18D3.1 PE=1 SV=1	4	1	1	1	523	58.6	144267			0	High	Not Found	Not Found
Q09599	Histone RNA hairpin-binding protein OS=Caenorhabditis elegans OX=6239 GN=cdl-1 PE=2 SV=1	4	1	1	1	367	41.5		188409		188409	Not Found	High	Not Found
Q95ZV0	Dauer Up-Regulated OS=Caenorhabditis elegans OX=6239 GN=dur-1 PE=1 SV=3	3	1	1	1	798	81.5	119235			0	High	Not Found	Not Found
Q18599	AcetylCoA_hyd_C domain-containing protein OS=Caenorhabditis elegans OX=6239 GN=acer-1 PE=1 SV=3	3	1	1	1	471	50.7			88480.4	88480.4	Not Found	Not Found	High
Q9XVP0	40S ribosomal protein S15 OS=Caenorhabditis elegans OX=6239 GN=rps-15 PE=1 SV=3	8	1	1	1	151	17.2			431929	431929	Not Found	Not Found	High
Q9NAH4	Density-regulated protein homolog OS=Caenorhabditis elegans OX=6239 GN=Y47D3A.21 PE=3 SV=1	7	1	1	1	192	20.3	131781			0	High	Not Found	Not Found
O45552	ACetyl-CoA Acyltransferase 2 homolog OS=Caenorhabditis elegans OX=6239 GN=acaa-2 PE=1 SV=2	2	1	1	1	394	41.3	89450.3			0	High	Not Found	Not Found
P91910	Tubulin alpha-3 chain OS=Caenorhabditis elegans OX=6239 GN=mec-12 PE=1 SV=1	4	1	1	1	450	50.1	115943			0	High	Not Found	Not Found
E2JL06	YchF-GTPase_C domain-containing protein OS=Caenorhabditis elegans OX=6239 GN=ola-1 PE=1 SV=1	8	1	1	1	125	13.9	40730.3			0	High	Not Found	Not Found
P91415	Uncharacterized protein OS=Caenorhabditis elegans OX=6239 GN=CELE_T01D1.3 PE=1 SV=1	5	1	1	1	216	24.4	107806			0	High	Not Found	Not Found
G5EFM7	Uncharacterized protein OS=Caenorhabditis elegans OX=6239 GN=CELE_F18C12.3 PE=1 SV=1	2	1	1	1	545	61.6	27724.2			0	High	Not Found	Not Found
Q22935	Uncharacterized protein OS=Caenorhabditis elegans OX=6239 GN=C50E3.12 PE=1 SV=1	2	1	1	1	382	43.4	9080199			0	High	Not Found	Not Found
Q7JKI3	Phosphoenolypyruvate CarboxyKinase OS=Caenorhabditis elegans OX=6239 GN=pck-2 PE=1 SV=1	2	1	1	1	587	65.9	147722			0	High	Not Found	Not Found
W6EKY2	14-3-3 zeta OS=Caenorhabditis elegans OX=6239 GN=ftt-2 PE=1 SV=1	3	1	1	1	248	27.7		625336		625336	Not Found	High	Not Found
G5EBV4	Galectin OS=Caenorhabditis elegans OX=6239 GN=lec-10 PE=1 SV=1	6	1	1	1	192	22	181229			0	High	Not Found	Not Found
Q9N3D9	NADH Ubiquinone oxidoreductase Fe-S protein OS=Caenorhabditis elegans OX=6239 GN=nduf-5 PE=1 SV=1	8	1	1	1	121	14	262055			0	High	Not Found	Not Found
Q65XX4	Uncharacterized protein OS=Caenorhabditis elegans OX=6239 GN=CELE_Y47G6A.15 PE=1 SV=1	4	1	1	1	278	30.8	76429			0	High	Not Found	Not Found
Q17698	DUF148 domain-containing protein OS=Caenorhabditis elegans OX=6239 GN=nlp-77 PE=1 SV=1	15	1	1	1	151	15.9	72202.3			0	High	Not Found	Not Found
O45865	Adenine Nucleotide Translocator OS=Caenorhabditis elegans OX=6239 GN=ant-1.1 PE=1 SV=1	3	1	1	1	300	33		173921		173921	Not Found	High	Not Found
Q4TT88	Puromycin-sensitive aminopeptidase OS=Caenorhabditis elegans OX=6239 GN=pam-1 PE=1 SV=1	1	1	1	1	948	107.1	131558			0	High	Not Found	Not Found
P48158	60S ribosomal protein L23 OS=Caenorhabditis elegans OX=6239 GN=rpl-23 PE=3 SV=1	6	1	1	1	140	14.9		700080		700080	Not Found	High	Not Found
Q8MXJ3	MATH (Meprin-associated Traf homology) domain containing OS=Caenorhabditis elegans OX=6239 GN=math-3 PE=4 SV=1	3	1	1	1	225	26.9	571188			0	High	Not Found	Not Found
H2L2E5	GRound-Like (Grd related) OS=Caenorhabditis elegans OX=6239 GN=grl-23 PE=1 SV=2	3	1	1	1	301	31.3		381367		381367	Not Found	High	Not Found
Q09347	Uncharacterized protein T05H10.3 OS=Caenorhabditis elegans OX=6239 GN=T05H10.3 PE=1 SV=1	6	1	1	1	158	18.4	116833			0	High	Not Found	Not Found
G5EEK3	Non-centrosomal microtubule array protein 1 OS=Caenorhabditis elegans OX=6239 GN=noca-1 PE=2 SV=1	1	1	1	1	922	103.6		312917		312917	Not Found	High	Not Found
U4PCD4	Phosphorylase b kinase regulatory subunit OS=Caenorhabditis elegans OX=6239 GN=CELE_Y67D8A.2 PE=1 SV=1	3	1	1	1	531	59.8	169296			0	High	Not Found	Not Found
A0A2C9C365	Muscle M-line assembly protein unc-89 OS=Caenorhabditis elegans OX=6239 GN=unc-89 PE=1 SV=1	0	1	1	1	5912	652.5			44351.3	44351.3	Not Found	Not Found	High
Q9GP96	LIM zinc-binding domain-containing protein OS=Caenorhabditis elegans OX=6239 GN=mlp-1 PE=1 SV=3	13	1	1	1	111	12.3	121442			0	High	Not Found	Not Found
O45075	PHD-type domain-containing protein OS=Caenorhabditis elegans OX=6239 GN=CELE_F53H1.4 PE=1 SV=3	1	1	1	1	1275	146.7			1.79542e+06	1.79542e+06	Not Found	Not Found	High
O01532	Peptidase A1 domain-containing protein OS=Caenorhabditis elegans OX=6239 GN=asp-5 PE=1 SV=1	4	1	1	1	393	42		55742.4		55742.4	Not Found	High	Not Found
O01159	Probable splicing factor, arginine/serine-rich 7 OS=Caenorhabditis elegans OX=6239 GN=rsp-7 PE=3 SV=3	3	1	1	1	452	52.6	95309.8			0	High	Not Found	Not Found
O01530	Aspartic protease 6 OS=Caenorhabditis elegans OX=6239 GN=asp-6 PE=1 SV=1	4	1	1	1	389	41.5	79439.7			0	High	Not Found	Not Found
P17140	Collagen alpha-2(IV) chain OS=Caenorhabditis elegans OX=6239 GN=let-2 PE=1 SV=2	1	1	1	1	1758	167.6			13264715	13264715	Not Found	Not Found	High
Q18577	DUF148 domain-containing protein OS=Caenorhabditis elegans OX=6239 GN=C42D4.1 PE=1 SV=1	4	1	1	1	251	28.5	132490			0	High	Not Found	Not Found
P34462	V-type proton ATPase subunit D OS=Caenorhabditis elegans OX=6239 GN=vha-14 PE=3 SV=1	3	1	1	1	257	28.8		958828		958828	Not Found	High	Not Found
P61866	60S ribosomal protein L12 OS=Caenorhabditis elegans OX=6239 GN=rpl-12 PE=3 SV=1	9	1	1	1	165	17.8	285918			0	High	Not Found	Not Found
P52814	60S ribosomal protein L39 OS=Caenorhabditis elegans OX=6239 GN=rpl-39 PE=3 SV=1	20	1	1	1	51	6.3	598618			0	High	Not Found	Not Found
O45226	60S ribosomal protein L29 OS=Caenorhabditis elegans OX=6239 GN=rpl-29 PE=1 SV=1	11	1	1	1	62	7.2	42181.5			0	High	Not Found	Not Found
V6CLG8	Chaperonin homolog Hsp-60, mitochondrial OS=Caenorhabditis elegans OX=6239 GN=hsp-60 PE=1 SV=1	6	1	1	1	262	27.3	78110.4			0	High	Not Found	Not Found
H2KZL7	Thioredoxin domain-containing protein OS=Caenorhabditis elegans OX=6239 GN=prdx-2 PE=1 SV=1	4	1	1	1	199	22.3	554610			0	High	Not Found	Not Found
O45819	GlYcoGenin like OS=Caenorhabditis elegans OX=6239 GN=gyg-2 PE=1 SV=1	5	1	1	1	300	33.6	219744			0	High	Not Found	Not Found
O16259	Stress-induced-phosphoprotein 1 OS=Caenorhabditis elegans OX=6239 GN=sti-1 PE=1 SV=1	4	1	1	1	320	36.9	98747.1			0	High	Not Found	Not Found
U4PC51	Transket_pyr domain-containing protein OS=Caenorhabditis elegans OX=6239 GN=ogdh-1 PE=1 SV=1	1	1	1	1	802	90.9	53186.6			0	High	Not Found	Not Found
Q9N4I3	Uncharacterized protein OS=Caenorhabditis elegans OX=6239 GN=CELE_Y71F9AL.9 PE=1 SV=1	5	1	1	1	314	32.2	91649.6			0	High	Not Found	Not Found
O17725	DUF19 domain-containing protein OS=Caenorhabditis elegans OX=6239 GN=CELE_D1086.3 PE=1 SV=1	7	1	1	1	194	21.8	184005			0	High	Not Found	Not Found
P90889	Uncharacterized protein OS=Caenorhabditis elegans OX=6239 GN=CELE_F55H12.4 PE=1 SV=1	6	1	1	1	208	22	75435.9			0	High	Not Found	Not Found
Q23315	Glutamyl(E) Amino-acyl tRNA Synthetase OS=Caenorhabditis elegans OX=6239 GN=ears-1 PE=1 SV=1	3	1	1	1	1149	125.1			308951	308951	Not Found	Not Found	High
Q27389	60S ribosomal protein L13a OS=Caenorhabditis elegans OX=6239 GN=rpl-16 PE=2 SV=1	4	1	1	1	202	23	569668			0	High	Not Found	Not Found
E3W737	Protein kinase domain-containing protein OS=Caenorhabditis elegans OX=6239 GN=prpf-4 PE=1 SV=1	2	1	1	1	748	87.6		219260		219260	Not Found	High	Not Found
P08898	Histone H3 OS=Caenorhabditis elegans OX=6239 GN=his-2 PE=1 SV=4	5	1	1	1	136	15.4		2.72824e+06		2.72824e+06	Not Found	High	Not Found
Q21276	Nucleolar protein 56 OS=Caenorhabditis elegans OX=6239 GN=nol-56 PE=3 SV=1	5	1	1	1	486	54.5		238372		238372	Not Found	High	Not Found
O17684	Uncharacterized protein OS=Caenorhabditis elegans OX=6239 GN=C49F5.6 PE=4 SV=1	1	1	1	1	784	85.2		120792		120792	Not Found	High	Not Found
H9G353	Basement membrane proteoglycan OS=Caenorhabditis elegans OX=6239 GN=unc-52 PE=1 SV=1	0	1	1	1	2196	240.4	138689			0	High	Not Found	Not Found
H2KY56	PWWP domain-containing protein OS=Caenorhabditis elegans OX=6239 GN=C06A5.3 PE=1 SV=1	1	1	1	1	780	86.3		1398259		1398259	Not Found	High	Not Found
Q21351	Ras-Gtpase-activating protein SH3 (Three) domain-Binding Protein OS=Caenorhabditis elegans OX=6239 GN=gtbp-1 PE=1 SV=2	3	1	1	1	473	52.4				0	High	Not Found	Not Found
Q93573	Translationally-controlled tumor protein homolog OS=Caenorhabditis elegans OX=6239 GN=tct-1 PE=1 SV=1	9	1	1	1	181	20.5	53963			0	High	Not Found	Not Found
G5EBP0	Uncharacterized protein OS=Caenorhabditis elegans OX=6239 GN=CELE_K08C7.6 PE=1 SV=1	2	1	1	1	285	33.5	71690.8			0	High	Not Found	Not Found
P34689	ATP-dependent RNA helicase glh-1 OS=Caenorhabditis elegans OX=6239 GN=glh-1 PE=1 SV=3	1	1	1	1	763	79.7	629503			0	High	Not Found	Not Found
O45595	Protection of telomeres homolog 2 OS=Caenorhabditis elegans OX=6239 GN=pot-2 PE=3 SV=1	7	1	1	1	251	29		28923		28923	Not Found	High	Not Found
P12844	Myosin-3 OS=Caenorhabditis elegans OX=6239 GN=myo-3 PE=2 SV=1	1	1	1	1	1969	225.4	95791.6			0	High	Not Found	Not Found
P12845	Myosin-2 OS=Caenorhabditis elegans OX=6239 GN=myo-2 PE=1 SV=2	1	1	1	1	1947	222.9	100088			0	High	Not Found	Not Found
Q20970	Methionine--tRNA ligase, cytoplasmic OS=Caenorhabditis elegans OX=6239 GN=mars-1 PE=3 SV=1	2	1	1	1	917	101.6	50644.3			0	High	Not Found	Not Found
V6CJB8	KETtiN (Drosophila actin-binding) homolog OS=Caenorhabditis elegans OX=6239 GN=ketn-1 PE=1 SV=1	0	1	1	1	4922	549.9			82777.4	82777.4	Not Found	Not Found	High
Q94230	Pur alpha Like Protein OS=Caenorhabditis elegans OX=6239 GN=plp-1 PE=1 SV=1	6	1	1	1	226	25.5	45084			0	High	Not Found	Not Found
G5EEL9	HMG OS=Caenorhabditis elegans OX=6239 GN=hmg-11 PE=1 SV=1	9	1	1	1	137	14			145720	145720	Not Found	Not Found	High
Q23621	Glutamate dehydrogenase OS=Caenorhabditis elegans OX=6239 GN=gdh-1 PE=1 SV=1	2	1	1	1	536	58.8	98859.1			0	High	Not Found	Not Found

## Sheet: Column Legends
Coverage
The percentage of the protein sequence covered by identified peptides.
# Unique Peptides
The number of peptide sequences that are unique to a protein. These are the peptides that do not occur in the proteins of any other group that are idetified in the data set.
# Peptides
The total number of distinct peptide sequences matching to the protein.
# PSM's
The number of peptide spectrum matches. The number of PSM's is the total number of identified peptide spectra matched for the protein. The PSM value may be higher than the number of peptides identified for high-scoring proteins because peptides may be identified repeatedly.
Abundance
Here, the sum of the precursor intensities for all unique peptides that belong to the protein, as determined by the Minora Feature Detection in Proteome Discoverer. Presented separately per sample.
Found in Sample
The maximal confidence level with which peptides that belong to the protein of interest are identified in the particular sample.
